# Supplementary material
Source: PubMed Central journal article supplement (PMC6730639)
Supplement: NIHMS1042348-supplement-4.pdf [file NIHMS1042348-supplement-4.pdf]

\*Numbers start from the top right of the TMA

| No. | Age | Sex | Site (Anatomic) | Pathology diagnosis                         | TNM     | Grade | Stage | Type      | ER  | PR  | HER2 |
|-----|-----|-----|-----------------|---------------------------------------------|---------|-------|-------|-----------|-----|-----|------|
| 1   | 46  | F   | Breast          | Invasive ductal carcinoma                   | T3N0M0  | 1     | IIB   | Malignant | +++ | +++ | 0    |
| 2   | 59  | F   | Breast          | Invasive ductal carcinoma                   | T1N0M0  | 1     | I     | Malignant | -   | -   | 3+   |
| 3   | 29  | F   | Breast          | Invasive ductal carcinoma                   | T2N0M0  | 1     | IIA   | Malignant | ++  | -   | 0    |
| 4   | 55  | F   | Breast          | Invasive ductal carcinoma                   | T2N0M0  | 2     | IIA   | Malignant | +++ | -   | 0    |
| 5   | 72  | F   | Breast          | Invasive ductal carcinoma with necrosis (s  | T2N1M0  | 2     | IIB   | Malignant | -   | -   | 3+   |
| 6   | 30  | F   | Breast          | Invasive ductal carcinoma                   | T2N2M0  | 2     | IIIA  | Malignant | -   | -   | 3+   |
| 7   | 64  | F   | Breast          | Invasive ductal carcinoma                   | T2N0M0  | 1     | IIA   | Malignant | +++ | +++ | 2+   |
| 8   | 30  | F   | Breast          | Invasive ductal carcinoma                   | T1CN0M0 | 2     | I     | Malignant | ++  | +++ | 0    |
| 9   | 67  | F   | Breast          | Invasive ductal carcinoma                   | T2N0M0  | 2     | IIA   | Malignant | +++ | ++  | 0    |
| 10  | 50  | F   | Breast          | Invasive ductal carcinoma                   | T4N0M0  | 2     | IIIB  | Malignant | -   | -   | 0    |
| 11  | 62  | F   | Breast          | Invasive ductal carcinoma                   | T2N1M0  | 2     | IIB   | Malignant | -   | -   | 0    |
| 12  | 52  | F   | Breast          | Invasive ductal carcinoma of No. 44         | T2N1M0  | 2     | IIB   | Malignant | ++  | -   | 3+   |
| 13  | 43  | F   | Breast          | Invasive ductal carcinoma                   | T1CN0M0 | 2     | I     | Malignant | +++ | +++ | 0    |
| 14  | 41  | F   | Breast          | Invasive ductal carcinoma                   | T3N2M0  | 2     | IIIA  | Malignant | -   | -   | 0    |
| 15  | 53  | F   | Breast          | Invasive ductal carcinoma                   | T2N0M0  | 2     | IIA   | Malignant | +   | -   | 3+   |
| 16  | 48  | F   | Breast          | Invasive ductal carcinoma                   | T2N0M0  | 2     | IIA   | Malignant | ++  | -   | 1+   |
| 17  | 42  | F   | Breast          | Invasive ductal carcinoma                   | T2N0M0  | 2     | IIA   | Malignant | -   | -   | 0    |
| 18  | 53  | F   | Breast          | Invasive ductal carcinoma                   | T2N0M0  | 2     | IIA   | Malignant | +++ | -   | 1+   |
| 19  | 68  | F   | Breast          | Invasive ductal carcinoma                   | T2N0M0  | 2     | IIA   | Malignant | +++ | ++  | 1+   |
| 20  | 38  | F   | Breast          | Invasive ductal carcinoma                   | T2N0M0  | 2     | IIA   | Malignant | +++ | +++ | 0    |
| 21  | 50  | F   | Breast          | Invasive ductal carcinoma                   | T2N1M0  | 2     | IIB   | Malignant | -   | -   | 0    |
| 22  | 48  | F   | Breast          | Invasive ductal carcinoma                   | T4N2M0  | 2     | IIIB  | Malignant | -   | ++  | 0    |
| 23  | 44  | F   | Breast          | Invasive ductal carcinoma                   | T4BN0M0 | 2     | IIIB  | Malignant | ++  | +   | 0    |
| 24  | 38  | F   | Breast          | Invasive ductal carcinoma                   | T2N0M0  | 2     | IIA   | Malignant | ++  | -   | 2+   |
| 25  | 45  | F   | Breast          | Invasive ductal carcinoma                   | T1N0M0  | 2     | I     | Malignant | -   | -   | 0    |
| 26  | 32  | F   | Breast          | Invasive ductal carcinoma                   | T2N0M0  | 2     | IIA   | Malignant | +++ | +++ | 2+   |
| 27  | 52  | F   | Breast          | Invasive ductal carcinoma                   | T4N0M0  | 2     | IIIB  | Malignant | ++  | -   | 0    |
| 28  | 53  | F   | Breast          | Invasive ductal carcinoma                   | T2N0M0  | 2     | IIA   | Malignant | -   | -   | 3+   |
| 29  | 42  | F   | Breast          | Invasive ductal carcinoma                   | T2N0M0  | 2     | IIA   | Malignant | +   | +++ | 0    |
| 30  | 44  | F   | Breast          | Invasive ductal carcinoma                   | T1N0M0  | 2     | I     | Malignant | +++ | +++ | 0    |
| 31  | 63  | F   | Breast          | Invasive ductal carcinoma                   | T2N0M1  | 2     | IIA   | Malignant | +++ | -   | 0    |
| 32  | 45  | F   | Breast          | Invasive ductal carcinoma                   | T2N0M0  | 2     | IIA   | Malignant | +   | +   | 0    |
| 33  | 51  | F   | Breast          | Invasive ductal carcinoma                   | T2N1M0  | 2     | IIB   | Malignant | -   | -   | 3+   |
| 34  | 63  | F   | Breast          | Invasive ductal carcinoma                   | T2N0M0  | 2     | IIA   | Malignant | +++ | -   | 2+   |
| 35  | 54  | F   | Breast          | Invasive ductal carcinoma                   | T1N0M0  | 2     | I     | Malignant | +++ | +   | 3+   |
| 36  | 65  | F   | Breast          | Invasive ductal carcinoma                   | T1N2M0  | 2     | IIIA  | Malignant | -   | -   | 0    |
| 37  | 38  | F   | Breast          | Invasive ductal carcinoma                   | T2N0M0  | 2     | IIA   | Malignant | -   | +   | 0    |
| 38  | 35  | F   | Breast          | Invasive ductal carcinoma (brease tissue)   | T1N0M0  | -     | I     | Malignant | -   | +   | 0    |
| 39  | 54  | F   | Breast          | Invasive ductal carcinoma                   | T2N0M0  | 2     | IIA   | Malignant | ++  | -   | 0    |
| 40  | 29  | F   | Breast          | Invasive ductal carcinoma                   | T2N0M0  | 2     | IIA   | Malignant | -   | -   | 3+   |
| 41  | 50  | F   | Breast          | Invasive ductal carcinoma (fatty tissue and | T2N2M0  | -     | IIIA  | Malignant | *   | *   | *    |
| 42  | 55  | F   | Breast          | Invasive ductal carcinoma                   | T4N0M0  | 2     | IIIB  | Malignant | -   | -   | 1+   |
| 43  | 45  | F   | Breast          | Invasive ductal carcinoma                   | T2N0M0  | 2     | IIA   | Malignant | -   | ++  | 0    |
| 44  | 43  | F   | Breast          | Invasive ductal carcinoma                   | T2N0M0  | 2     | IIA   | Malignant | ++  | +++ | 0    |
| 45  | 45  | F   | Breast          | Invasive ductal carcinoma                   | T2N0M0  | 2     | IIA   | Malignant | -   | -   | 0    |
| 46  | 50  | F   | Breast          | Invasive ductal carcinoma                   | T1N0M0  | 2     | I     | Malignant | +++ | +++ | 0    |
| 47  | 28  | F   | Breast          | Invasive ductal carcinoma                   | T1N1M0  | 2     | IIA   | Malignant | -   | -   | 3+   |
| 48  | 45  | F   | Breast          | Invasive ductal carcinoma                   | T2N0M0  | 2     | IIA   | Malignant | +++ | ++  | 2+   |
| 49  | 63  | F   | Breast          | Invasive ductal carcinoma                   | T2N0M0  | 3     | IIA   | Malignant | +++ | +++ | 0    |
| 50  | 65  | F   | Breast          | Invasive ductal carcinoma                   | T2N0M0  | 2     | IIA   | Malignant | ++  | ++  | 0    |
| 51  | 71  | F   | Breast          | Invasive ductal carcinoma                   | T2N2M0  | 2     | IIIA  | Malignant | +++ | ++  | 0    |
| 52  | 52  | F   | Breast          | Invasive ductal carcinoma                   | T2N0M0  | 2     | IIB   | Malignant | -   | -   | 0    |
| 53  | 62  | F   | Breast          | Invasive ductal carcinoma                   | T2N0M0  | 2     | IIA   | Malignant | ++  | ++  | 1+   |
| 54  | 45  | F   | Breast          | Invasive ductal carcinoma                   | T2N0M0  | 2     | IIA   | Malignant | -   | -   | 0    |
| 55  | 38  | F   | Breast          | Invasive ductal carcinoma                   | T2N1M0  | 2     | IIB   | Malignant | -   | -   | 2+   |
| 56  | 46  | F   | Breast          | Invasive ductal carcinoma                   | T2N0M0  | 2     | IIA   | Malignant | -   | -   | 2+   |
| 57  | 32  | F   | Breast          | Invasive ductal carcinoma                   | T1N0M0  | 2     | I     | Malignant | -   | -   | 0    |
| 58  | 41  | F   | Breast          | Invasive ductal carcinoma                   | T4N1M0  | 2     | IIIB  | Malignant | ++  | +   | 2+   |
| 59  | 37  | F   | Breast          | Invasive ductal carcinoma                   | T2N1M0  | 2     | IIB   | Malignant | -   | -   | 0    |
| 60  | 29  | F   | Breast          | Invasive ductal carcinoma                   | T2N0M0  | 2     | IIA   | Malignant | -   | -   | 3+   |
| 61  | 62  | F   | Breast          | Invasive ductal carcinoma                   | T2N0M0  | 2     | IIA   | Malignant | -   | -   | 0    |
| 62  | 50  | F   | Breast          | Invasive ductal carcinoma                   | T3N2M0  | 3     | IIIA  | Malignant | -   | -   | 1+   |
| 63  | 55  | F   | Breast          | Invasive ductal carcinoma                   | T2N0M0  | 2     | IIA   | Malignant | -   | -   | 0    |

|     |    |   |        |                                              |         |      |      |           |     |     |    |
|-----|----|---|--------|----------------------------------------------|---------|------|------|-----------|-----|-----|----|
| 64  | 45 | F | Breast | Invasive ductal carcinoma                    | T3N0M0  | 2    | IIIA | Malignant | +++ | -   | 1+ |
| 65  | 56 | F | Breast | Invasive ductal carcinoma                    | T2N1M0  | 3    | IIB  | Malignant | -   | -   | 0  |
| 66  | 48 | F | Breast | Invasive ductal carcinoma                    | T2N2M0  | 3    | IIIA | Malignant | -   | -   | 3+ |
| 67  | 42 | F | Breast | Invasive ductal carcinoma                    | T2N1M0  | 3    | IIB  | Malignant | +++ | -   | 0  |
| 68  | 47 | F | Breast | Invasive ductal carcinoma                    | T4N0M0  | 3    | IIIB | Malignant | -   | +   | 0  |
| 69  | 44 | F | Breast | Invasive lobular carcinoma                   | T2N0M0  | -    | IIA  | Malignant | ++  | -   | 1+ |
| 70  | 55 | F | Breast | Invasive lobular carcinoma                   | T2N2M0  | -    | IIIA | Malignant | -   | +   | 2+ |
| 71  | 47 | F | Breast | Invasive lobular carcinoma                   | T2N1M0  | -    | IIB  | Malignant | ++  | +   | 0  |
| 72  | 51 | F | Breast | Invasive lobular carcinoma (sparse)          | T2N1M0  | -    | IIB  | Malignant | +   | -   | 2+ |
| 73  | 69 | F | Breast | Invasive lobular carcinoma                   | T2N0M0  | -    | IIA  | Malignant | -   | -   | 0  |
| 74  | 54 | F | Breast | Invasive lobular carcinoma                   | T2N1M0  | -    | IIB  | Malignant | -   | ++  | 0  |
| 75  | 59 | F | Breast | Invasive lobular carcinoma                   | T4N0M0  | -    | IIIB | Malignant | +   | -   | 0  |
| 76  | 70 | F | Breast | Invasive lobular carcinoma                   | T4N0M0  | -    | IIIA | Malignant | -   | -   | 0  |
| 77  | 38 | F | Breast | Invasive lobular carcinoma                   | T2N0M0  | -    | IIA  | Malignant | +   | ++  | 0  |
| 78  | 42 | F | Breast | Invasive lobular carcinoma                   | T2N1M0  | -    | IIB  | Malignant | -   | -   | 0  |
| 79  | 47 | F | Breast | Invasive lobular carcinoma                   | T2N0M0  | -    | IIA  | Malignant | +   | ++  | 0  |
| 80  | 41 | F | Breast | Invasive lobular carcinoma                   | T4N0M0  | -    | IIIB | Malignant | -   | +   | 0  |
| 81  | 19 | F | Breast | Invasive lobular carcinoma                   | T2N1M0  | -    | IIB  | Malignant | +   | -   | 0  |
| 82  | 40 | F | Breast | Invasive lobular carcinoma                   | T2N1M0  | -    | IIB  | Malignant | -   | -   | 0  |
| 83  | 52 | F | Breast | Invasive lobular carcinoma                   | T2N1M0  | -    | IIB  | Malignant | -   | -   | 0  |
| 84  | 59 | F | Breast | Invasive lobular carcinoma (breast tissue)   | T2N0M0  | -    | IIA  | Malignant | *   | *   | *  |
| 85  | 48 | F | Breast | Invasive lobular carcinoma (sparse)          | T2N1M0  | -    | IIB  | Malignant | +   | -   | 0  |
| 86  | 50 | F | Breast | Invasive lobular carcinoma (sparse)          | T2N1M0  | -    | IIB  | Malignant | -   | -   | 0  |
| 87  | 45 | F | Breast | Invasive lobular carcinoma                   | T2N1M0  | -    | IIB  | Malignant | +   | ++  | 0  |
| 88  | 38 | F | Breast | Invasive lobular carcinoma                   | T3N1M0  | -    | IIIA | Malignant | +   | -   | 3+ |
| 89  | 52 | F | Breast | Invasive lobular carcinoma                   | T2N0M0  | -    | IIA  | Malignant | -   | -   | 3+ |
| 90  | 45 | F | Breast | Invasive lobular carcinoma                   | T2N1M0  | -    | IIB  | Malignant | -   | -   | 0  |
| 91  | 44 | F | Breast | Squamous cell carcinoma                      | T1N0M0  | 1--2 | I    | Malignant | -   | -   | 0  |
| 92  | 37 | F | Breast | Squamous cell carcinoma                      | T3N0M0  | 2    | IIB  | Malignant | -   | -   | 0  |
| 93  | 48 | F | Breast | Squamous cell carcinoma                      | T4N0M0  | 2    | IIIB | Malignant | -   | -   | 0  |
| 94  | 47 | F | Breast | Squamous cell carcinoma                      | T1N0M0  | 2    | I    | Malignant | -   | -   | 3+ |
| 95  | 36 | F | Breast | Intraductal carcinoma                        | TisN0M0 | -    | 0    | Malignant | ++  | ++  | 1+ |
| 96  | 67 | F | Breast | Intraductal carcinoma (sparse)               | TisN0M0 | -    | 0    | Malignant | *   | -   | 3+ |
| 97  | 45 | F | Breast | Intraductal carcinoma                        | TisN0M0 | -    | 0    | Malignant | -   | -   | 3+ |
| 98  | 68 | F | Breast | Intraductal carcinoma                        | TisN0M0 | -    | 0    | Malignant | +++ | +++ | 0  |
| 99  | 54 | F | Breast | Intraductal carcinoma                        | TisN0M0 | -    | 0    | Malignant | ++  | ++  | 0  |
| 100 | 45 | F | Breast | Intraductal carcinoma                        | TisN0M0 | -    | 0    | Malignant | ++  | ++  | 0  |
| 101 | 46 | F | Breast | Intraductal carcinoma                        | TisN0M0 | -    | 0    | Malignant | +   | ++  | 0  |
| 102 | 52 | F | Breast | Intraductal carcinoma                        | TisN0M0 | -    | 0    | Malignant | +   | +   | 0  |
| 103 | 47 | F | Breast | Intraductal carcinoma (adenosis)             | TisN0M0 | -    | 0    | Malignant | +   | +   | 0  |
| 104 | 41 | F | Breast | Intraductal carcinoma                        | TisN0M0 | -    | 0    | Malignant | -   | -   | 0  |
| 105 | 47 | F | Breast | Intraductal carcinoma                        | T2N0M0  | -    | IIA  | Malignant | -   | -   | 3+ |
| 106 | 48 | F | Breast | Intraductal carcinoma (breast tissue)        | TisN0M0 | -    | 0    | Malignant | +   | -   | 0  |
| 107 | 47 | F | Breast | Intraductal carcinoma with early infiltratic | T2N0M0  | -    | IIA  | Malignant | +++ | +++ | 0  |
| 108 | 45 | F | Breast | Intraductal carcinoma                        | TisN0M0 | -    | 0    | Malignant | -   | -   | 2+ |
| 109 | 39 | F | Breast | Intraductal carcinoma                        | TisN0M0 | -    | 0    | Malignant | -   | -   | 3+ |
| 110 | 46 | F | Breast | Intraductal carcinoma                        | TisN0M0 | -    | 0    | Malignant | -   | -   | 3+ |
| 111 | 49 | F | Breast | Intraductal carcinoma                        | TisN0M0 | -    | 0    | Malignant | +   | +   | 2+ |
| 112 | 45 | F | Breast | Intraductal carcinoma                        | TisN0M0 | -    | 0    | Malignant | +++ | +++ | 0  |
| 113 | 30 | F | Breast | Intraductal carcinoma (duct tissue)          | TisN0M0 | -    | 0    | Malignant | *   | *   | *  |
| 114 | 47 | F | Breast | Intraductal carcinoma                        | T2N1M0  | -    | IIB  | Malignant | -   | +   | 3+ |
| 115 | 64 | F | Breast | Intraductal carcinoma                        | TisN0M0 | -    | 0    | Malignant | +++ | +   | 0  |
| 116 | 49 | F | Breast | Intraductal carcinoma                        | T2N0M0  | -    | IIA  | Malignant | -   | -   | 3+ |
| 117 | 55 | F | Breast | Intraductal carcinoma                        | TisN0M0 | -    | 0    | Malignant | ++  | ++  | 0  |
| 118 | 43 | F | Breast | Lobular carcinoma in situ (adenosis)         | TisN0M0 | -    | 0    | Malignant | -   | +   | 0  |
| 119 | 79 | F | Breast | Lobular carcinoma in situ                    | TisN0M0 | -    | 0    | Malignant | -   | -   | 0  |
| 120 | 48 | F | Breast | Lobular carcinoma in situ                    | TisN0M0 | -    | 0    | Malignant | ++  | ++  | 0  |
| 121 | 44 | F | Breast | Fibroadenoma                                 | -       | -    | -    | Benign    | ++  | ++  | 0  |
| 122 | 27 | F | Breast | Fibroadenoma                                 | -       | -    | -    | Benign    | -   | +   | 0  |
| 123 | 23 | F | Breast | Fibroadenoma                                 | -       | -    | -    | Benign    | ++  | +   | 0  |
| 124 | 45 | F | Breast | Fibroadenoma                                 | -       | -    | -    | Benign    | ++  | ++  | 0  |
| 125 | 19 | F | Breast | Fibroadenoma                                 | -       | -    | -    | Benign    | ++  | +   | 0  |
| 126 | 23 | F | Breast | Fibroadenoma                                 | -       | -    | -    | Benign    | +   | +   | 0  |
| 127 | 34 | F | Breast | Fibroadenoma                                 | -       | -    | -    | Benign    | +   | +   | 0  |
| 128 | 25 | F | Breast | Fibroadenoma                                 | -       | -    | -    | Benign    | +   | +   | 0  |

|     |    |   |        |                                              |   |   |   |              |     |    |    |
|-----|----|---|--------|----------------------------------------------|---|---|---|--------------|-----|----|----|
| 129 | 48 | F | Breast | Adenosis with hyperplasia of breast duct     | - | - | - | Hyperplasia  | +   | +  | 0  |
| 130 | 82 | F | Breast | Adenosis with hyperplasia of breast duct     | - | - | - | Hyperplasia  | -   | +  | 0  |
| 131 | 38 | F | Breast | Adenosis with hyperplasia of breast duct     | - | - | - | Hyperplasia  | +   | +  | 0  |
| 132 | 41 | F | Breast | Moderate hyperplasia of breast duct          | - | - | - | Hyperplasia  | +   | +  | 0  |
| 133 | 40 | F | Breast | Atypical hyperplasia in duct (grade II)      | - | - | - | Hyperplasia  | +++ | ++ | 0  |
| 134 | 76 | F | Breast | Adenosis with hyperplasia of breast duct     | - | - | - | Hyperplasia  | ++  | +  | 0  |
| 135 | 37 | F | Breast | Adenosis with hyperplasia of breast duct     | - | - | - | Hyperplasia  | ++  | +  | 0  |
| 136 | 43 | F | Breast | Hyperplasia of breast duct (hyalinosis of fi | - | - | - | Hyperplasia  | *   | *  | *  |
| 137 | 45 | F | Breast | Adenosis with moderate hyperplasia of du     | - | - | - | Hyperplasia  | ++  | ++ | 0  |
| 138 | 46 | F | Breast | Hyperplasia (sparse breast tissue)           | - | - | - | Hyperplasia  | *   | *  | *  |
| 139 | 45 | F | Breast | Hyperplasia (adenosis)                       | - | - | - | Hyperplasia  | +   | +  | 0  |
| 140 | 39 | F | Breast | Hyperplasia (adenosis)                       | - | - | - | Hyperplasia  | +   | +  |    |
| 141 | 40 | F | Breast | Hyperplasia (adenosis)                       | - | - | - | Hyperplasia  | +   | +  | 0  |
| 142 | 19 | F | Breast | Hyperplasia (adenosis)                       | - | - | - | Hyperplasia  | -   | -  | 0  |
| 143 | 28 | F | Breast | Hyperplasia (fibrous tissue and blood vess   | - | - | - | Hyperplasia  | *   | *  | *  |
| 144 | 35 | F | Breast | Hyperplasia (adenosis)                       | - | - | - | Hyperplasia  | +   | *  | *  |
| 145 | 29 | F | Breast | Interstitial chronic inflammation            | - | - | - | Inflammation | -   | +  | 0  |
| 146 | 45 | F | Breast | Interstitial chronic inflammation            | - | - | - | Inflammation | -   | -  | 0  |
| 147 | 31 | F | Breast | Interstitial chronic inflammation            | - | - | - | Inflammation | -   | -  | 0  |
| 148 | 33 | F | Breast | Interstitial chronic inflammation            | - | - | - | Inflammation | -   | -  | 0  |
| 149 | 39 | F | Breast | Interstitial chronic inflammation with spar  | - | - | - | Inflammation | +   | +  | 3+ |
| 150 | 40 | F | Breast | Interstitial chronic inflammation (adenosis  | - | - | - | Inflammation | -   | -  | 0  |
| 151 | 44 | F | Breast | Chronic inflammation                         | - | - | - | Inflammation | +   | +  | 0  |
| 152 | 29 | F | Breast | Acute mastitis                               | - | - | - | Inflammation | -   | -  | 0  |
| 153 | 43 | F | Breast | Plasma cell mastitis                         | - | - | - | Inflammation | +   | -  | 0  |
| 154 | 55 | F | Breast | Plasma cell mastitis                         | - | - | - | Inflammation | -   | -  | 0  |
| 155 | 28 | F | Breast | Plasma cell mastitis                         | - | - | - | Inflammation | -   | -  | 0  |
| 156 | 26 | F | Breast | Plasma cell mastitis (fibrous tissue and blc | - | - | - | Inflammation | -   | -  | 0  |
| 157 | 35 | F | Breast | Plasma cell mastitis                         | - | - | - | Inflammation | -   | -  | 0  |
| 158 | 78 | F | Breast | Plasma cell mastitis                         | - | - | - | Inflammation | -   | -  | 0  |
| 159 | 46 | F | Breast | Plasma cell mastitis                         | - | - | - | Inflammation | -   | -  | 0  |
| 160 | 32 | F | Breast | Plasma cell mastitis                         | - | - | - | Inflammation | -   | -  | 0  |
| 161 | 38 | F | Breast | Cancer adjacent normal breast tissue         | - | - | - | NAT          | -   | +  | 0  |
| 162 | 55 | F | Breast | Cancer adjacent normal breast tissue (fatt   | - | - | - | NAT          | -   | *  | 0  |
| 163 | 57 | F | Breast | Cancer adjacent normal breast tissue (fatt   | - | - | - | NAT          | *   | *  | 0  |
| 164 | 53 | F | Breast | Cancer adjacent normal breast tissue (duc    | - | - | - | NAT          | -   | *  | 0  |
| 165 | 43 | F | Breast | Cancer adjacent normal breast tissue         | - | - | - | NAT          | +   | +  | 0  |
| 166 | 35 | F | Breast | Cancer adjacent normal breast tissue         | - | - | - | NAT          | -   | +  | 0  |
| 167 | 38 | F | Breast | Cancer adjacent normal breast tissue (fibr   | - | - | - | NAT          | *   | *  | 0  |
| 168 | 42 | F | Breast | Cancer adjacent normal breast tissue         | - | - | - | NAT          | +   | +  | 0  |
| 169 | 46 | F | Breast | Cancer adjacent normal breast tissue         | - | - | - | NAT          | -   | +  | 0  |
| 170 | 50 | F | Breast | Cancer adjacent normal breast tissue with    | - | - | - | Normal       | -   | -  | 0  |
| 171 | 40 | F | Breast | Cancer adjacent normal breast tissue         | - | - | - | NAT          | +   | +  | 0  |
| 172 | 50 | F | Breast | Cancer adjacent normal breast tissue (fibr   | - | - | - | NAT          | *   | *  | 0  |
| 173 | 35 | F | Breast | Cancer adjacent normal breast tissue (fibr   | - | - | - | NAT          | *   | *  | 0  |
| 174 | 44 | F | Breast | Cancer adjacent normal breast tissue of N    | - | - | - | NAT          | +   | -  | 0  |
| 175 | 48 | F | Breast | Cancer adjacent normal breast tissue         | - | - | - | NAT          | -   | +  | 0  |
| 176 | 45 | F | Breast | Cancer adjacent normal breast tissue         | - | - | - | NAT          | +   | -  | 0  |
