# Supplementary material
Source: PubMed Central journal article supplement (PMC6730639)
Supplement: NIHMS1042348-supplement-5.pdf [file NIHMS1042348-supplement-5.pdf]

## Supplemental Table 2: Proteins

\* documented literature supported differential cellular localization

| Protein name                                                                   | Protein accession numbers         | Protein identification probability | Exclusive unique peptide count | Exclusive unique spectrum count | Exclusive spectrum count | Localization     |
|--------------------------------------------------------------------------------|-----------------------------------|------------------------------------|--------------------------------|---------------------------------|--------------------------|------------------|
| Collagen alpha-1(I) chain OS=Homo sapiens GN=COL1A1                            | sp P02452 CO1A1                   | 100.00%                            | 16                             | 16                              | 92                       | ECM              |
| Collagen alpha-2(I) chain OS=Homo sapiens GN=COL1A2                            | sp P08123 CO1A2                   | 100.00%                            | 20                             | 20                              | 326                      | ECM              |
| Collagen alpha-1(III) chain OS=Homo sapiens GN=COL3A1                          | sp P02461 CO3A1                   | 100.00%                            | 6                              | 6                               | 13                       | ECM              |
| Collagen alpha-2(IV) chain OS=Homo sapiens GN=COL4A2                           | sp P08572 CO4A2                   | 100.00%                            | 2                              | 3                               | 7                        | ECM              |
| Collagen alpha-1(V) chain OS=Homo sapiens GN=COL5A1                            | sp P20908 CO5A1                   | 100.00%                            | 6                              | 8                               | 11                       | ECM              |
| Collagen alpha-2(V) chain OS=Homo sapiens GN=COL5A2                            | sp P05997 CO5A2                   | 100.00%                            | 4                              | 6                               | 15                       | ECM              |
| Collagen alpha-1(VI) chain OS=Homo sapiens GN=COL6A1                           | sp P12109 CO6A1                   | 100.00%                            | 6                              | 10                              | 14                       | ECM              |
| Collagen alpha-2(VI) chain OS=Homo sapiens GN=COL6A2                           | sp P12110 CO6A2                   | 100.00%                            | 13                             | 14                              | 23                       | ECM              |
| Collagen alpha-3(VI) chain OS=Homo sapiens GN=COL6A3                           | sp P12111 CO6A3                   | 100.00%                            | 36                             | 36                              | 45                       | ECM              |
| Collagen alpha-1(XII) chain OS=Homo sapiens GN=COL12A1                         | sp Q99715 COCA1                   | 100.00%                            | 4                              | 4                               | 4                        | ECM              |
| Collagen alpha-1(XIV) chain OS=Homo sapiens GN=COL14A1                         | sp Q05707 COEA1                   | 100.00%                            | 18                             | 24                              | 39                       | ECM              |
| Collagen alpha-1(XIV) chain OS=Homo sapiens GN=COL14A1                         | sp Q05707 COEA1                   | 100.00%                            | 2                              | 4                               | 6                        | ECM              |
| Collagen alpha-1(XVI) chain OS=Homo sapiens GN=COL16A1                         | sp Q07092 COGA1                   | 100.00%                            | 1                              | 2                               | 2                        | ECM              |
| Asporin OS=Homo sapiens GN=ASPN                                                | sp Q9BXN1 ASPN                    | 100.00%                            | 2                              | 2                               | 3                        | ECM              |
| Biglycan OS=Homo sapiens GN=BGN                                                | sp P21810 PGS1                    | 100.00%                            | 15                             | 15                              | 25                       | ECM              |
| Decorin OS=Homo sapiens GN=DCN                                                 | sp P07585 PGS2                    | 100.00%                            | 8                              | 8                               | 13                       | ECM              |
| Dermatopontin OS=Homo sapiens GN=DPT                                           | sp Q07507 DERM                    | 100.00%                            | 2                              | 2                               | 2                        | ECM              |
| EMILIN-1 OS=Homo sapiens GN=EMILIN1                                            | sp Q9Y6C2 EMIL1                   | 100.00%                            | 2                              | 2                               | 2                        | ECM              |
| Alpha-enolase OS=Homo sapiens GN=ENO1                                          | sp P06733 ENOA                    | 100.00%                            | 9                              | 10                              | 15                       | Memb/Cyto*       |
| Fibrinogen alpha chain OS=Homo sapiens GN=FGA                                  | sp P02671 FIBA                    | 100.00%                            | 8                              | 10                              | 20                       | ECM              |
| Fibrinogen gamma chain OS=Homo sapiens GN=FGG                                  | sp P02679-2 FIBG,sp P02679 FIBG   | 100.00%                            | 6                              | 7                               | 15                       | ECM              |
| Isoform 14 of Fibronectin OS=Homo sapiens GN=FN1                               | sp P02751-14 FINC                 | 100.00%                            | 2                              | 2                               | 3                        | ECM              |
| Gelsolin OS=Homo sapiens GN=GSN                                                | sp P06396 GELS                    | 100.00%                            | 16                             | 16                              | 19                       | Cyto/ECM         |
| Galectin-3 OS=Homo sapiens GN=LGALS3                                           | sp P17931 LEG3                    | 100.00%                            | 2                              | 2                               | 2                        | ECM              |
| Prelamin-A/C OS=Homo sapiens GN=LMNA                                           | sp P02545 LMNA                    | 100.00%                            | 2                              | 2                               | 4                        | ECM              |
| Lumican OS=Homo sapiens GN=LUM                                                 | sp P51884 LUM                     | 100.00%                            | 15                             | 15                              | 23                       | ECM              |
| Microfibril-associated glycoprotein 4 OS=Homo sapiens GN=MFAP4                 | sp P55083-2 MFAP4,sp P55083 MFAP4 | 100.00%                            | 2                              | 2                               | 3                        | ECM              |
| Protein disulfide-isomerase OS=Homo sapiens GN=P4HB                            | sp P07237 PDIA1                   | 100.00%                            | 4                              | 4                               | 4                        | ER/Mem*          |
| Phosphatidylethanolamine-binding protein 1 OS=Homo sapiens GN=PEBP1            | sp P30086 PEBP1                   | 100.00%                            | 5                              | 5                               | 7                        | ECM/Mem          |
| Isoform 4 of Plectin OS=Homo sapiens GN=PLEC                                   | sp Q15149-4 PLEC                  | 100.00%                            | 3                              | 3                               | 3                        | Cyto/ECM         |
| Isoform 3 of Periostin OS=Homo sapiens GN=POSTN                                | sp Q15063-3 POSTN                 | 100.00%                            | 9                              | 11                              | 25                       | ECM              |
| Peroxisome assembly factor 5, mitochondrial OS=Homo sapiens GN=PRDX5           | sp P30044 PRDX5                   | 100.00%                            | 4                              | 4                               | 7                        | Mito/Peroxisome* |
| Prolargin OS=Homo sapiens GN=PRELP                                             | sp P51888 PRELP                   | 100.00%                            | 6                              | 7                               | 8                        | ECM              |
| Alpha-1-antitrypsin OS=Homo sapiens GN=SERPINA1                                | sp P01009 A1AT                    | 100.00%                            | 6                              | 6                               | 8                        | ECM              |
| Transforming growth factor-beta-induced protein ig-h3 OS=Homo sapiens GN=TGFBI | sp Q15582 BGH3                    | 100.00%                            | 3                              | 3                               | 3                        | ECM              |
| Talin-1 OS=Homo sapiens GN=TLN1                                                | sp Q9Y490 TLN1                    | 100.00%                            | 2                              | 2                               | 2                        | ECM/Cyto         |
| Tenascin-X OS=Homo sapiens GN=TNXB                                             | sp P22105 TENX                    | 100.00%                            | 2                              | 2                               | 2                        | ECM              |
| Vimentin OS=Homo sapiens GN=VIM                                                | sp P08670 VIME                    | 100.00%                            | 34                             | 36                              | 49                       | ECM              |
| X-ray repair cross-complementing protein 5 OS=Homo sapiens GN=XRCC5            | sp P13010 XRCC5                   | 100.00%                            | 3                              | 4                               | 7                        | Nucleus          |
