# Supplementary material
Source: PubMed Central journal article supplement (PMC6730639)
Supplement: NIHMS1042348-supplement-6.pdf [file NIHMS1042348-supplement-6.pdf]

Supplemental Table 4: Peptides

| Protein name                                                                  | Protein accession numbers | Protein identification probability | Exclusive peptide count | Exclusive spectrum count | Exclusive spectrum count | Percentage of total spectra | Percentage of sequence coverage | Peptide sequence     | Best Peptide identification probability | Best SEQUEST Xcorr score | Best SEQUEST Y score | Best Mascot ion score | Best Mascot identity score | Best Mascot identity score | Number of identified +1H spectra | Number of identified +2H spectra | Number of identified +3H spectra | Number of identified +4H spectra | Number of identified +5H spectra | Number of enzymatic termini | Calculated Delta Ion | Identified Mass (AMU) | Median Retention Time | Total TIC |
|-------------------------------------------------------------------------------|---------------------------|------------------------------------|-------------------------|--------------------------|--------------------------|-----------------------------|---------------------------------|----------------------|-----------------------------------------|--------------------------|----------------------|-----------------------|----------------------------|----------------------------|----------------------------------|----------------------------------|----------------------------------|----------------------------------|----------------------------------|-----------------------------|----------------------|-----------------------|-----------------------|-----------|
| Alpha-1-antitrypsin GN-SERPINA1                                               | sp P01009 AIJ             | 100.00%                            | 6                       | 6                        | 8                        | 0.03%                       | 0.00%                           | LVKDFLEDVKK          | 99.70%                                  | 3.56                     | 0.290                | 30.2                  | 29.8                       | 19.8                       | 0                                | 1                                | 0                                | 0                                | 2                                | 1333.77                     | 206,534.00           | 4,880.93              | 206,534.00            |           |
| Alpha-1-antitrypsin GN-SERPINA1                                               | sp P01009 AIJ             | 100.00%                            | 6                       | 6                        | 8                        | 0.03%                       | 0.00%                           | LNQPSDQLQLTTGG       | 99.70%                                  | 2.61                     | 0.427                | 39.0                  | 33.3                       | 24.0                       | 0                                | 1                                | 0                                | 0                                | 2                                | 1585.78                     | 160,958.00           | 4,977.88              | 160,958.00            |           |
| Alpha-1-antitrypsin GN-SERPINA1                                               | sp P01009 AIJ             | 100.00%                            | 6                       | 6                        | 8                        | 0.03%                       | 0.00%                           | LTHQITFLFLENDK       | 99.70%                                  | 3.29                     | 0.463                | 33.5                  | 34.1                       | 33.5                       | 0                                | 1                                | 0                                | 0                                | 2                                | 1843.96                     | 314,076.00           | 6,875.47              | 314,076.00            |           |
| Alpha-1-antitrypsin GN-SERPINA1                                               | sp P01009 AIJ             | 100.00%                            | 6                       | 6                        | 8                        | 0.03%                       | 0.00%                           | LVKQVLDQPSQDLQ       | 99.70%                                  | 3.86                     | 0.524                | 38.0                  | 32.0                       | 48.0                       | 0                                | 1                                | 0                                | 0                                | 2                                | 1525.83                     | 1,101,580.00         | 4,643.69              | 1,101,580.00          |           |
| Alpha-1-antitrypsin GN-SERPINA1                                               | sp P01009 AIJ             | 100.00%                            | 6                       | 6                        | 8                        | 0.03%                       | 0.00%                           | VVGLGLGTFKFSNGADLSG  | 99.70%                                  | 3.34                     | 0.576                | 29.6                  | 33.0                       | 29.6                       | 0                                | 1                                | 0                                | 0                                | 2                                | 1876.02                     | 7,666.30             | 446,286.00            | 446,286.00            |           |
| Alpha-1-antitrypsin GN-SERPINA1                                               | sp P01009 AIJ             | 100.00%                            | 6                       | 6                        | 8                        | 0.03%                       | 0.00%                           | LRLTLNQPSDQLQLTTGG   | 99.70%                                  | 3.87                     | 0.588                | 79.3                  | 33.9                       | 79.3                       | 0                                | 2                                | 0                                | 0                                | 2                                | 2069.10                     | 5,690.56             | 456,283.00            | 456,283.00            |           |
| Alpha-1-antitrypsin GN-SERPINA1                                               | sp P01009 AIJ             | 100.00%                            | 1                       | 1                        | 3                        | 0.02%                       | 0.00%                           | LRLTLNQPSDQLQ        | 99.70%                                  | 4.02                     | 0.483                | 54.1                  | 31.2                       | 38.7                       | 0                                | 3                                | 0                                | 0                                | 2                                | 1525.83                     | 3,887.19             | 1,436,800.00          | 1,436,800.00          |           |
| Alpha-enolase GN-ENO1                                                         | sp P06733 ENI             | 100.00%                            | 9                       | 10                       | 15                       | 0.06%                       | 0.00%                           | KAYNQLLRILEELGSK     | 99.70%                                  | 2.29                     | 0.280                | 30.1                  | 32.0                       | 16.0                       | 0                                | 0                                | 0                                | 1                                | 2                                | 2004.11                     | 65,525.50            | 5,932.90              | 55,525.50             |           |
| Alpha-enolase GN-ENO1                                                         | sp P06733 ENI             | 100.00%                            | 9                       | 10                       | 15                       | 0.06%                       | 0.00%                           | SVGLVDKPSQDPSPIRY    | 99.70%                                  | 3.08                     | 0.369                | 27.7                  | 32.0                       | 13.6                       | 0                                | 0                                | 0                                | 2                                | 1989.92                          | 669,241.00                  | 5,089.54             | 669,241.00            |                       |           |
| Alpha-enolase GN-ENO1                                                         | sp P06733 ENI             | 100.00%                            | 9                       | 10                       | 15                       | 0.06%                       | 0.00%                           | FAPVLENKKGLG         | 99.70%                                  | 2.78                     | 0.387                | 24.6                  | 33.4                       | 11.3                       | 0                                | 1                                | 0                                | 0                                | 2                                | 1586.84                     | 7,570.14             | 225,040.00            | 225,040.00            |           |
| Alpha-enolase GN-ENO1                                                         | sp P06733 ENI             | 100.00%                            | 9                       | 10                       | 15                       | 0.06%                       | 0.00%                           | AVPSGASTGIYFALE      | 99.70%                                  | 2.73                     | 0.427                | 36.3                  | 33.4                       | 36.3                       | 0                                | 1                                | 0                                | 0                                | 2                                | 1464.72                     | 6,618.71             | 426,736.00            | 426,736.00            |           |
| Alpha-enolase GN-ENO1                                                         | sp P06733 ENI             | 100.00%                            | 9                       | 10                       | 15                       | 0.06%                       | 0.00%                           | SPDQLALVYSF          | 99.70%                                  | 2.63                     | 0.446                | 58.3                  | 33.5                       | 58.3                       | 0                                | 3                                | 0                                | 0                                | 2                                | 1496.76                     | 8,634.74             | 317,561.00            | 317,561.00            |           |
| Alpha-enolase GN-ENO1                                                         | sp P06733 ENI             | 100.00%                            | 9                       | 10                       | 15                       | 0.06%                       | 0.00%                           | LVRIIEELGSK          | 99.70%                                  | 3.57                     | 0.513                | 31.1                  | 32.3                       | 17.5                       | 0                                | 0                                | 1                                | 0                                | 2                                | 1286.73                     | 5,282.63             | 504,381.00            | 504,381.00            |           |
| Alpha-enolase GN-ENO1                                                         | sp P06733 ENI             | 100.00%                            | 9                       | 10                       | 15                       | 0.06%                       | 0.00%                           | VVISIEDPQQDQDWGA     | 99.70%                                  | 3.05                     | 0.554                | 46.7                  | 29.4                       | 46.7                       | 0                                | 1                                | 0                                | 0                                | 2                                | 1692.74                     | 8,569.66             | 125,911.00            | 125,911.00            |           |
| Alpha-enolase GN-ENO1                                                         | sp P06733 ENI             | 100.00%                            | 9                       | 10                       | 15                       | 0.06%                       | 0.00%                           | VVISIEDPQQDQDWGAQWK  | 99.70%                                  | 4.30                     | 0.582                | 67.7                  | 31.8                       | 67.7                       | 0                                | 3                                | 1                                | 0                                | 2                                | 2134.97                     | 4,844.07             | 1,268,050.00          | 1,268,050.00          |           |
| Alpha-enolase GN-ENO1                                                         | sp P06733 ENI             | 100.00%                            | 9                       | 10                       | 15                       | 0.06%                       | 0.00%                           | GNPTVEVDLTSKG        | 99.70%                                  | 3.28                     | 0.614                | 47.1                  | 33.6                       | 47.1                       | 0                                | 1                                | 0                                | 0                                | 2                                | 1463.74                     | 6,443.75             | 684,183.00            | 684,183.00            |           |
| Alpha-enolase GN-ENO1                                                         | sp P06733 ENI             | 100.00%                            | 3                       | 3                        | 5                        | 0.03%                       | 0.00%                           | AAVPSGASTGIYFALE     | 99.70%                                  | 2.38                     | 0.402                | 35.9                  | 33.9                       | 24.2                       | 0                                | 1                                | 0                                | 0                                | 2                                | 1535.76                     | 5,856.76             | 441,223.00            | 441,223.00            |           |
| Alpha-enolase GN-ENO1                                                         | sp P06733 ENI             | 100.00%                            | 3                       | 3                        | 5                        | 0.03%                       | 0.00%                           | LVRIIEELGSK          | 99.70%                                  | 3.13                     | 0.439                | 26.3                  | 30.4                       | 11.0                       | 0                                | 0                                | 2                                | 0                                | 2                                | 1286.73                     | 4,233.41             | 468,368.00            | 468,368.00            |           |
| Alpha-enolase GN-ENO1                                                         | sp P06733 ENI             | 100.00%                            | 3                       | 3                        | 5                        | 0.03%                       | 0.00%                           | VVISIEDPQQDQDWGAQWK  | 99.70%                                  | 4.68                     | 0.606                | 57.5                  | 32.7                       | 57.5                       | 0                                | 2                                | 0                                | 0                                | 2                                | 2134.97                     | 7,346.33             | 414,427.00            | 414,427.00            |           |
| Arginase 1 GN-ARG1                                                            | sp P05089 ARI             | 100.00%                            | 1                       | 1                        | 1                        | 0.01%                       | 5.59%                           | FTPATGTPVVGGLTYREG   | 99.70%                                  | 3.51                     | 0.470                | 59.1                  | 33.8                       | 59.1                       | 0                                | 1                                | 0                                | 0                                | 2                                | 1822.93                     | 5,412.40             | 922,780.00            | 922,780.00            |           |
| Asporin GN-ASPN                                                               | sp Q98KN1 AS              | 100.00%                            | 2                       | 2                        | 3                        | 0.01%                       | 6.32%                           | LTSTPTNIPFTR         | 99.70%                                  | 1.97                     | 0.379                | 44.8                  | 33.6                       | 44.8                       | 0                                | 1                                | 0                                | 0                                | 2                                | 1460.77                     | 6,106.10             | 1,506,260.00          | 1,506,260.00          |           |
| Asporin GN-ASPN                                                               | sp Q98KN1 AS              | 100.00%                            | 2                       | 2                        | 3                        | 0.01%                       | 6.32%                           | LSFNPPLPKS           | 99.70%                                  | 2.83                     | 0.494                | 20.5                  | 26.5                       | 26.5                       | 0                                | 1                                | 0                                | 0                                | 2                                | 1210.70                     | 6,210.56             | 782,965.00            | 782,965.00            |           |
| ATP-dependent RNA helicase A GN-DHX9                                          | sp Q0R211 DH              | 100.00%                            | 1                       | 1                        | 2                        | 0.01%                       | 0.00%                           | FATPQISMOLKNE        | 99.70%                                  | 1.84                     | 0.531                | 60.1                  | 33.0                       | 60.1                       | 0                                | 1                                | 0                                | 0                                | 2                                | 1622.77                     | 6,803.37             | 353,113.00            | 353,113.00            |           |
| Basement membrane-specific heparan sulfate proteoglycan core protein GN-HSPG2 | sp P98160 PGI             | 100.00%                            | 1                       | 1                        | 1                        | 0.00%                       | 0.23%                           | LADLDLIR             | 99.70%                                  | 3.44                     | 0.276                | 65.2                  | 30.5                       | 39.5                       | 0                                | 1                                | 0                                | 0                                | 2                                | 1170.67                     | 7,850.43             | 231,771.00            | 231,771.00            |           |
| Basement membrane-specific heparan sulfate proteoglycan core protein GN-HSPG2 | sp P98160 PGI             | 100.00%                            | 1                       | 1                        | 1                        | 0.01%                       | 0.23%                           | LAGIDTLIR            | 99.70%                                  | 3.30                     | 0.399                | 40.6                  | 25.4                       | 28.3                       | 0                                | 1                                | 0                                | 0                                | 2                                | 1084.67                     | 6,672.22             | 89,207.40             | 89,207.40             |           |
| Bigglycan GN-BGN                                                              | sp P21810 PGI             | 100.00%                            | 15                      | 15                       | 25                       | 0.10%                       | 0.00%                           | ILELELLR             | 99.70%                                  | 2.26                     | 0.090                | 54.5                  | 32.1                       | 26.1                       | 0                                | 2                                | 0                                | 0                                | 2                                | 1000.57                     | 7,584.44             | 216,577.00            | 216,577.00            |           |
| Bigglycan GN-BGN                                                              | sp P21810 PGI             | 100.00%                            | 15                      | 15                       | 25                       | 0.10%                       | 0.00%                           | LIHLDHNNKAELELLIR    | 99.70%                                  | 3.69                     | 0.297                | 34.1                  | 32.3                       | 12.0                       | 0                                | 2                                | 0                                | 0                                | 2                                | 2170.30                     | 7,177.34             | 314,931.00            | 314,931.00            |           |
| Bigglycan GN-BGN                                                              | sp P21810 PGI             | 100.00%                            | 15                      | 15                       | 25                       | 0.10%                       | 0.00%                           | LRISAEKLTGPKPLPET    | 99.70%                                  | 3.38                     | 0.304                | 33.2                  | 30.1                       | 21.9                       | 0                                | 0                                | 1                                | 0                                | 2                                | 1981.13                     | 5,891.87             | 170,460.00            | 170,460.00            |           |
| Bigglycan GN-BGN                                                              | sp P21810 PGI             | 100.00%                            | 15                      | 15                       | 25                       | 0.10%                       | 0.00%                           | VPSSGLPKDL           | 99.70%                                  | 1.73                     | 0.310                | 58.3                  | 27.9                       | 29.5                       | 0                                | 3                                | 0                                | 0                                | 2                                | 1038.62                     | 20,013.00            | 7,061.66              | 20,013.00             |           |
| Bigglycan GN-BGN                                                              | sp P21810 PGI             | 100.00%                            | 15                      | 15                       | 25                       | 0.10%                       | 0.00%                           | IQALELELLR           | 99.70%                                  | 2.88                     | 0.374                | 56.0                  | 30.6                       | 43.1                       | 0                                | 2                                | 0                                | 0                                | 2                                | 1312.75                     | 8,390.46             | 712,945.00            | 712,945.00            |           |
| Bigglycan GN-BGN                                                              | sp P21810 PGI             | 100.00%                            | 15                      | 15                       | 25                       | 0.10%                       | 0.00%                           | LTGPKLPETLINE        | 99.70%                                  | 2.49                     | 0.385                | 25.5                  | 32.5                       | 25.5                       | 0                                | 1                                | 0                                | 0                                | 2                                | 1539.83                     | 5,517,420.00         | 6,293.37              | 5,517,420.00          |           |
| Bigglycan GN-BGN                                                              | sp P21810 PGI             | 100.00%                            | 15                      | 15                       | 25                       | 0.10%                       | 0.00%                           | LFNNPPVYVEVQPAT      | 99.70%                                  | 3.39                     | 0.397                | 24.1                  | 33.9                       | 14.0                       | 0                                | 1                                | 0                                | 0                                | 2                                | 1774.88                     | 8,064.55             | 211,759.00            | 211,759.00            |           |
| Bigglycan GN-BGN                                                              | sp P21810 PGI             | 100.00%                            | 15                      | 15                       | 25                       | 0.10%                       | 0.00%                           | VPSSGLPKLLQ          | 99.70%                                  | 3.12                     | 0.411                | 51.1                  | 27.6                       | 33.6                       | 0                                | 3                                | 0                                | 0                                | 2                                | 1279.76                     | 7,556.88             | 1,280,740.00          | 1,280,740.00          |           |
| Bigglycan GN-BGN                                                              | sp P21810 PGI             | 100.00%                            | 15                      | 15                       | 25                       | 0.10%                       | 0.00%                           | ISEAKLTGPKLPETLINE   | 99.70%                                  | 3.41                     | 0.414                | 41.5                  | 33.5                       | 22.1                       | 0                                | 0                                | 1                                | 0                                | 2                                | 2068.12                     | 6,344.33             | 572,200.00            | 572,200.00            |           |
| Bigglycan GN-BGN                                                              | sp P21810 PGI             | 100.00%                            | 15                      | 15                       | 25                       | 0.10%                       | 0.00%                           | LRISAEKLTGPKLPETLINE | 99.70%                                  | 2.89                     | 0.425                | 20.3                  | 32.0                       | 20.3                       | 0                                | 1                                | 0                                | 0                                | 2                                | 2337.30                     | 6,551.40             | 227,561.00            | 227,561.00            |           |
| Bigglycan GN-BGN                                                              | sp P21810 PGI             | 100.00%                            | 15                      | 15                       | 25                       | 0.10%                       | 0.00%                           | LTGPKLPETLINE        | 99.70%                                  | 3.36                     | 0.450                | 60.0                  | 33.6                       | 48.3                       | 0                                | 2                                | 0                                | 0                                | 2                                | 1887.92                     | 7,464.82             | 1,091,150.00          | 1,091,150.00          |           |
| Bigglycan GN-BGN                                                              | sp P21810 PGI             | 100.00%                            | 15                      | 15                       | 25                       | 0.10%                       | 0.00%                           | FDGLKLYR             | 99.70%                                  | 2.67                     | 0.457                | 32.6                  | 31.9                       | 18.1                       | 0                                | 0                                | 0                                | 2                                | 1969.50                          | 6,341.23                    | 248,724.00           | 248,724.00            |                       |           |
| Bigglycan GN-BGN                                                              | sp P21810 PGI             | 100.00%                            | 15                      | 15                       | 25                       | 0.10%                       | 0.00%                           | LSFNNPPVYVEVQPAT     | 99.70%                                  | 4.21                     | 0.489                | 32.4                  | 34.5                       | 32.4                       | 0                                | 1                                | 0                                | 0                                | 2                                | 1975.00                     | 9,047.03             | 129,518.00            | 129,518.00            |           |
| Bigglycan GN-BGN                                                              | sp P21810 PGI             | 100.00%                            | 15                      | 15                       | 25                       | 0.10%                       | 0.00%                           | LENSGFEPGAFQGLKLY    | 99.70%                                  | 3.71                     | 0.517                | 44.3                  | 33.8                       | 44.3                       | 0                                | 1                                | 0                                | 0                                | 2                                | 1970.95                     | 8,032.06             | 245,452.00            | 245,452.00            |           |
| Bigglycan GN-BGN                                                              | sp P21810 PGI             | 100.00%                            | 15                      | 15                       | 25                       | 0.10%                       | 0.00%                           | VPSSGLPDLGLVYV       | 99.70%                                  | 2.68                     | 0.633                | 26.2                  | 28.5                       | 26.2                       | 0                                | 2                                | 0                                | 0                                | 2                                | 1640.96                     | 5,178.51             | 664,215.00            | 664,215.00            |           |
| Bigglycan GN-BGN                                                              | sp P21810 PGI             | 100.00%                            | 2                       | 2                        | 2                        | 0.01%                       | 0.00%                           | LTGPKLPETLINE        | 99.70%                                  | 2.85                     | 0.301                | 29.1                  | 31.9                       | 16.6                       | 0                                | 1                                | 0                                | 0                                | 2                                | 1539.83                     | 5,625.92             | 172,966.00            | 172,966.00            |           |
| Bigglycan GN-BGN                                                              | sp P21810 PGI             | 100.00%                            | 2                       | 2                        | 2                        | 0.01%                       | 0.00%                           | VPSSGLPKDL           | 99.70%                                  | 2.62                     | 0.343                | 33.4                  | 26.3                       | 14.8                       | 0                                | 1                                | 0                                | 0                                | 2                                | 1038.62                     | 6,366.13             | 69,478.40             | 69,478.40             |           |
| Bigglycan GN-BGN                                                              | sp P21810 PGI             | 100.00%                            | 15                      | 15                       | 25                       | 0.10%                       | 0.00%                           | LMVGPVDEVRE          | 99.70%                                  | 2.16                     | 0.318                | 37.4                  | 32.6                       | 15.7                       | 0                                | 1                                | 0                                | 0                                | 2                                | 1243.64                     | 5,329.05             | 194,485.00            | 194,485.00            |           |
| Cathepsin D GN-CTSD                                                           | sp P07339 CAI             | 100.00%                            | 2                       | 3                        | 4                        | 0.02%                       | 4.37%                           | VDITGTSMLVGPVDEVRE   | 99.70%                                  | 4.49                     | 0.591                | 79.9                  | 34.3                       | 79.9                       | 0                                | 1                                | 0                                | 0                                | 2                                | 1932.96                     | 6,496.07             | 896,552.00            | 896,552.00            |           |
| Cathepsin D GN-CTSD                                                           | sp P07339 CAI             | 100.00%                            | 6                       | 7                        | 8                        | 0.05%                       | 12.90%                          | FLYSDPDADPGGELM      | 99.70%                                  | 2.49                     | 0.325                | 45.7                  | 32.7                       | 26.3                       | 0                                | 1                                | 0                                | 0                                | 2                                | 1443.64                     | 5,450.37             | 548,999.00            | 548,999.00            |           |
| Cathepsin D GN-CTSD                                                           | sp P07339 CAI             | 100.00%                            | 6                       | 7                        | 8                        | 0.05%                       | 12.90%                          | IAATFDGLG            | 99.70%                                  | 2.28                     | 0.362                | 22.2                  | 29.5                       | 22.2                       | 0                                | 1                                | 0                                | 0                                | 2                                | 1004.58                     | 5,429.11             | 114,689.00            | 114,689.00            |           |
| Cathepsin D GN-CTSD                                                           | sp P07339 CAI             | 100.00%                            | 6                       | 7                        | 8                        | 0.05%                       | 12.90%                          | ILGQVFIQR            | 99.70%                                  | 2.49                     | 0.424                | 28.3                  | 29.1                       | 14.1                       | 0                                | 1                                | 0                                | 0                                | 2                                | 989.58                      | 5,684.31             | 144,705.00            | 144,705.00            |           |
| Cathepsin D GN-CTSD                                                           | sp P07339 CAI             | 100.00%                            | 6                       | 7                        | 8                        | 0.05%                       | 12.90%                          | VDITGTSMLVGPVDEVRE   | 99.70%                                  | 3.05                     | 0.505                | 63.7                  | 34.1                       | 63.7                       | 0                                | 1                                | 0                                | 0                                | 2                                | 1803.92                     | 5,182.50             | 103,947.00            | 103,947.00            |           |
| Cathepsin D GN-CTSD                                                           | sp P07339 CAI             | 100.00%                            | 6                       | 7                        | 8                        | 0.05%                       | 12.90%                          | PYLSRDPADPGGELM      | 99.70%                                  | 2.90                     | 0.533                | 45.7                  | 32.6                       | 45.7                       | 0                                | 1                                | 0                                | 0                                | 2                                | 1811.83                     | 4,623.58             | 29,631.00             | 29,631.00             |           |
| Cathepsin D GN-CTSD                                                           | sp P07339 CAI             | 100.00%                            | 6                       | 7                        | 8                        | 0.05%                       | 12.90%                          | VDITGTSMLVGPVDEVRE   | 99.70%                                  | 4.72                     | 0.575                | 74.0                  | 34.4                       | 74.0                       | 0                                | 1                                | 0                                | 0                                | 2                                | 1932.96                     | 2,562,960.00         | 5,238.24              | 2,562,960.00          |           |
| Collagen alpha-1(I) chain GN-COL1A1                                           | sp P02452 CO              | 100.00%                            | 16                      | 16                       | 92                       | 0.35%                       | 2.46%                           | FLPPQPE              | 99.70%                                  | 2.02                     | 0.138                | 34.1                  | 31.6                       | 4.6                        | 0                                | 1                                | 0                                | 0                                | 2                                | 955.49                      | 4,980.29             | 348,213.00            | 348,213.00            |           |
| Collagen alpha-1(I) chain GN-COL1A1                                           | sp P02452 CO              | 100.00%                            | 16                      |                          |                          |                             |                                 |                      |                                         |                          |                      |                       |                            |                            |                                  |                                  |                                  |                                  |                                  |                             |                      |                       |                       |           |

|                                          |               |         |    |    |     |       |        |                            |        |      |       |       |      |       |   |    |   |   |         |          |              |               |
|------------------------------------------|---------------|---------|----|----|-----|-------|--------|----------------------------|--------|------|-------|-------|------|-------|---|----|---|---|---------|----------|--------------|---------------|
| Collagen alpha-1(XII) chain GN-COL12A1   | sp Q99715 CO  | 100.00% | 4  | 4  | 4   | 0.02% | 2.12%  | IATPDPODTHAYNVADFS         | 99.70% | 2.99 | 0.523 | 40.9  | 40.9 | 0     | 1 | 0  | 0 | 2 | 1980.85 | 5,775.83 | 58,043.60    |               |
| Collagen alpha-1(XIV) chain GN-COL14A1   | sp Q05707 CO  | 100.00% | 18 | 24 | 39  | 0.15% | 10.40% | VRAPHDPQPFPTVQDELEAMEL     | 99.70% | 2.59 | 0.226 | 42.3  | 34.1 | 42.3  | 0 | 0  | 1 | 0 | 2       | 2648.27  | 8,339.64     | 121,081.10    |
| Collagen alpha-1(XIV) chain GN-COL14A1   | sp Q05707 CO  | 100.00% | 18 | 24 | 39  | 0.15% | 10.40% | LNQSPSPSSSRHTQC            | 99.70% | 2.09 | 0.244 | 26.5  | 32.7 | 16.4  | 0 | 0  | 1 | 0 | 2       | 1779.97  | 4,504.79     | 45,636.60     |
| Collagen alpha-1(XIV) chain GN-COL14A1   | sp Q05707 CO  | 100.00% | 18 | 24 | 39  | 0.15% | 10.40% | FSTKDEIVEAWR               | 99.70% | 3.31 | 0.359 | 28.9  | 33.2 | 17.8  | 0 | 0  | 1 | 0 | 2       | 139.73   | 4,777.69     | 41,987.00     |
| Collagen alpha-1(XIV) chain GN-COL14A1   | sp Q05707 CO  | 100.00% | 18 | 24 | 39  | 0.15% | 10.40% | LALPMASDL                  | 99.70% | 2.29 | 0.373 | 28.2  | 33.0 | 12.1  | 0 | 1  | 0 | 0 | 2       | 1059.58  | 8,109.46     | 12,179.20     |
| Collagen alpha-1(XIV) chain GN-COL14A1   | sp Q05707 CO  | 100.00% | 18 | 24 | 39  | 0.15% | 10.40% | LIIVLDGSGSEVVT             | 99.70% | 2.33 | 0.377 | 35.4  | 33.8 | 25.4  | 0 | 1  | 0 | 0 | 2       | 1546.78  | 6,796.67     | 38,667.00     |
| Collagen alpha-1(XIV) chain GN-COL14A1   | sp Q05707 CO  | 100.00% | 18 | 24 | 39  | 0.15% | 10.40% | YHMFAGASDPVFGQGETT         | 99.70% | 2.91 | 0.412 | 22.5  | 28.3 | 42.5  | 0 | 1  | 0 | 0 | 2       | 2047.88  | 5,653.74     | 82,340.50     |
| Collagen alpha-1(XIV) chain GN-COL14A1   | sp Q05707 CO  | 100.00% | 18 | 24 | 39  | 0.15% | 10.40% | GERGLDQSDAMVR              | 99.70% | 1.27 | 0.415 | 28.3  | 33.0 | 28.3  | 0 | 0  | 1 | 0 | 2       | 1446.71  | 3,179.70     | 49,980.10     |
| Collagen alpha-1(XIV) chain GN-COL14A1   | sp Q05707 CO  | 100.00% | 18 | 24 | 39  | 0.15% | 10.40% | VRAPHDPQPFPTVQDELEAME      | 99.70% | 3.18 | 0.491 | 64.4  | 33.0 | 64.4  | 0 | 0  | 7 | 0 | 2       | 2535.18  | 6,053.60     | 7,784,130.00  |
| Collagen alpha-1(XIV) chain GN-COL14A1   | sp Q05707 CO  | 100.00% | 18 | 24 | 39  | 0.15% | 10.40% | ISDSOVQGFRTVY              | 99.70% | 2.93 | 0.497 | 19.1  | 32.8 | 19.1  | 0 | 1  | 0 | 0 | 2       | 1588.75  | 6,068.55     | 20,375.90     |
| Collagen alpha-1(XIV) chain GN-COL14A1   | sp Q05707 CO  | 100.00% | 18 | 24 | 39  | 0.15% | 10.40% | LEVKSPSVSGVSEMPGTGN        | 99.70% | 2.53 | 0.507 | 27.3  | 32.3 | 27.3  | 0 | 1  | 0 | 0 | 2       | 2157.01  | 5,947.66     | 19,889.00     |
| Collagen alpha-1(XIV) chain GN-COL14A1   | sp Q05707 CO  | 100.00% | 18 | 24 | 39  | 0.15% | 10.40% | LIIVLDGSGSEVVT             | 99.70% | 3.48 | 0.515 | 35.4  | 33.8 | 25.4  | 0 | 1  | 0 | 0 | 2       | 2409.33  | 11,132.03    | 8,095.33      |
| Collagen alpha-1(XIV) chain GN-COL14A1   | sp Q05707 CO  | 100.00% | 18 | 24 | 39  | 0.15% | 10.40% | MFGEASDPVFGQGETT           | 99.70% | 2.68 | 0.527 | 55.1  | 27.8 | 55.1  | 0 | 2  | 0 | 0 | 2       | 1698.72  | 5,353.53     | 1,031,990.00  |
| Collagen alpha-1(XIV) chain GN-COL14A1   | sp Q05707 CO  | 100.00% | 18 | 24 | 39  | 0.15% | 10.40% | ITGPFPTLTSVARS             | 99.70% | 3.20 | 0.538 | 82.8  | 33.6 | 82.8  | 0 | 1  | 0 | 0 | 2       | 1771.94  | 6,753.50     | 47,618.00     |
| Collagen alpha-1(XIV) chain GN-COL14A1   | sp Q05707 CO  | 100.00% | 18 | 24 | 39  | 0.15% | 10.40% | LTQVFTTTEVPADQZLEIDVTTDSFR | 99.70% | 1.47 | 0.570 | 28.5  | 35.2 | 28.5  | 0 | 0  | 1 | 0 | 2       | 3088.50  | 8,970.11     | 25,867.00     |
| Collagen alpha-1(XIV) chain GN-COL14A1   | sp Q05707 CO  | 100.00% | 18 | 24 | 39  | 0.15% | 10.40% | ITGPFPTLTSVARS             | 99.70% | 3.72 | 0.587 | 78.7  | 33.2 | 78.7  | 0 | 1  | 0 | 0 | 2       | 1584.81  | 6,676.52     | 949,147.00    |
| Collagen alpha-1(XIV) chain GN-COL14A1   | sp Q05707 CO  | 100.00% | 18 | 24 | 39  | 0.15% | 10.40% | VTTTEVPADQZLEIDVTTDSFR     | 99.70% | 4.86 | 0.604 | 70.0  | 34.4 | 70.0  | 0 | 2  | 2 | 0 | 2       | 2817.35  | 8,478.99     | 1,982,370.00  |
| Collagen alpha-1(XIV) chain GN-COL14A1   | sp Q05707 CO  | 100.00% | 18 | 24 | 39  | 0.15% | 10.40% | MFGEASDPVFGQGETT           | 99.70% | 3.58 | 0.621 | 40.2  | 30.8 | 40.2  | 0 | 2  | 0 | 0 | 2       | 1882.84  | 6,473.66     | 81,248.00     |
| Collagen alpha-1(XIV) chain GN-COL14A1   | sp Q05707 CO  | 100.00% | 18 | 24 | 39  | 0.15% | 10.40% | APHDPQPFPTVQDELEAME        | 99.70% | 4.85 | 0.632 | 52.5  | 29.7 | 52.5  | 0 | 8  | 2 | 0 | 2       | 2296.01  | 6,401.52     | 6,948,940.00  |
| Collagen alpha-1(XIV) chain GN-COL14A1   | sp Q05707 CO  | 100.00% | 2  | 4  | 6   | 0.04% | 1.22%  | VRAPHDPQPFPTVQDELEAME      | 99.70% | 2.83 | 0.451 | 63.2  | 33.6 | 63.2  | 0 | 0  | 3 | 0 | 2       | 2551.18  | 5,155.03     | 1,269,530.00  |
| Collagen alpha-1(XIV) chain GN-COL14A1   | sp Q07092 CO  | 100.00% | 1  | 2  | 2   | 0.01% | 0.81%  | FRGEIKMFDR                 | 99.70% | 3.42 | 0.337 | 15.9  | 33.5 | 1.5   | 0 | 0  | 1 | 1 | 2       | 1724.92  | 7,297.69     | 25,618.00     |
| Collagen alpha-1(XVIII) chain GN-COL18A1 | sp P39060 COI | 100.00% | 1  | 1  | 1   | 0.00% | 0.91%  | LFVQAQGGADPKKFG            | 99.70% | 3.30 | 0.467 | 38.0  | 33.7 | 38.0  | 0 | 1  | 0 | 0 | 2       | 1620.80  | 5,466.48     | 370,160.00    |
| Collagen alpha-1(XVIII) chain GN-COL18A1 | sp P39060 COI | 100.00% | 1  | 1  | 1   | 0.01% | 0.91%  | LFVQAQGGADPKKFG            | 99.70% | 2.61 | 0.399 | 25.0  | 34.0 | 25.0  | 0 | 1  | 0 | 0 | 2       | 1620.80  | 4,688.29     | 227,848.00    |
| Collagen alpha-2(I) chain GN-COL2A2      | sp P08123 CO  | 100.00% | 20 | 20 | 326 | 1.25% | 5.49%  | GGGVDFGYDGF                | 99.70% | 2.17 | 0.182 | 64.6  | 31.2 | 17.4  | 0 | 0  | 0 | 2 | 898.47  | 2,210.85 | 20,562.20    |               |
| Collagen alpha-2(I) chain GN-COL2A2      | sp P08123 CO  | 100.00% | 20 | 20 | 326 | 1.25% | 5.49%  | GPKEGAVGNA                 | 99.70% | 3.25 | 0.277 | 76.6  | 32.9 | 55.2  | 0 | 0  | 0 | 2 | 294.68  | 6,529.85 | 76,215.20    |               |
| Collagen alpha-2(I) chain GN-COL2A2      | sp P08123 CO  | 100.00% | 20 | 20 | 326 | 1.25% | 5.49%  | GADGAGVA                   | 99.70% | 1.82 | 0.285 | 40.9  | 31.3 | 15.1  | 0 | 1  | 0 | 0 | 2       | 833.39   | 2,446.25     | 26,543.90     |
| Collagen alpha-2(I) chain GN-COL2A2      | sp P08123 CO  | 100.00% | 20 | 20 | 326 | 1.25% | 5.49%  | GEIGAVGNA                  | 99.70% | 3.08 | 0.294 | 57.6  | 31.6 | 39.8  | 0 | 2  | 0 | 0 | 2       | 1012.51  | 3,865.24     | 339,034.00    |
| Collagen alpha-2(I) chain GN-COL2A2      | sp P08123 CO  | 100.00% | 20 | 20 | 326 | 1.25% | 5.49%  | GARGSDGSGVP                | 99.70% | 2.78 | 0.445 | 41.2  | 32.1 | 41.2  | 0 | 1  | 0 | 0 | 2       | 1058.52  | 2,685.25     | 128,478.00    |
| Collagen alpha-2(I) chain GN-COL2A2      | sp P08123 CO  | 100.00% | 20 | 20 | 326 | 1.25% | 5.49%  | GGGVDFGYDGF                | 99.70% | 2.65 | 0.508 | 58.7  | 32.1 | 42.4  | 0 | 2  | 0 | 0 | 2       | 1715.12  | 3,742.89     | 2,028,180.00  |
| Collagen alpha-2(I) chain GN-COL2A2      | sp P08123 CO  | 100.00% | 20 | 20 | 326 | 1.25% | 5.49%  | FYGGDYFYRA                 | 99.70% | 3.20 | 0.532 | 72.4  | 28.2 | 56.2  | 0 | 12 | 0 | 0 | 2       | 1210.52  | 6,024.07     | 11,500,000.00 |
| Collagen alpha-2(I) chain GN-COL2A2      | sp P08123 CO  | 100.00% | 20 | 20 | 326 | 1.25% | 5.49%  | YGGDYFYRA                  | 99.70% | 1.96 | 0.573 | 34.8  | 27.9 | 34.8  | 0 | 1  | 0 | 0 | 2       | 1006.43  | 4,346.11     | 46,346.10     |
| Collagen alpha-2(I) chain GN-COL2A2      | sp P08123 CO  | 100.00% | 20 | 20 | 326 | 1.25% | 5.49%  | FYGGDYFYRA                 | 99.70% | 3.15 | 0.605 | 57.2  | 28.1 | 57.2  | 0 | 4  | 0 | 0 | 2       | 1139.48  | 5,686.38     | 3,027,140.00  |
| Collagen alpha-2(I) chain GN-COL2A2      | sp P08123 CO  | 100.00% | 20 | 20 | 326 | 1.25% | 5.49%  | GGGVDFGYDGF                | 99.70% | 2.22 | 0.619 | 48.0  | 25.0 | 48.0  | 0 | 4  | 0 | 0 | 2       | 1269.47  | 7,174.94     | 1,601,400.00  |
| Collagen alpha-2(I) chain GN-COL2A2      | sp P08123 CO  | 100.00% | 20 | 20 | 326 | 1.25% | 5.49%  | GGGVDFGYDGF                | 99.70% | 4.19 | 0.652 | 66.5  | 25.0 | 66.5  | 0 | 59 | 0 | 0 | 2       | 1432.53  | 9,543.64     | 81,100,000.00 |
| Collagen alpha-2(I) chain GN-COL2A2      | sp P08123 CO  | 100.00% | 20 | 20 | 326 | 1.25% | 5.49%  | VSGGGYDFGYDGF              | 99.70% | 4.73 | 0.711 | 85.8  | 26.1 | 85.8  | 0 | 16 | 0 | 0 | 2       | 1774.73  | 6,607.92     | 8,334,980.00  |
| Collagen alpha-2(I) chain GN-COL2A2      | sp P08123 CO  | 100.00% | 20 | 20 | 326 | 1.25% | 5.49%  | VSGGGYDFGYDGFYRA           | 99.70% | 4.82 | 0.716 | 89.8  | 27.4 | 89.8  | 0 | 16 | 0 | 0 | 2       | 1845.77  | 6,830.43     | 13,400,000.00 |
| Collagen alpha-2(I) chain GN-COL2A2      | sp P08123 CO  | 100.00% | 20 | 20 | 326 | 1.25% | 5.49%  | GGGVDFGYDGFYRA             | 99.70% | 4.63 | 0.719 | 72.0  | 25.3 | 72.0  | 0 | 32 | 0 | 0 | 2       | 1659.67  | 6,980.32     | 82,600,000.00 |
| Collagen alpha-2(I) chain GN-COL2A2      | sp P08123 CO  | 100.00% | 20 | 20 | 326 | 1.25% | 5.49%  | VSGGGYDFGYDGFYRA           | 99.70% | 4.85 | 0.724 | 101.0 | 25.2 | 101.0 | 0 | 47 | 0 | 0 | 2       | 1902.79  | 7,483.65     | 87,500,000.00 |
| Collagen alpha-2(I) chain GN-COL2A2      | sp P08123 CO  | 100.00% | 20 | 20 | 326 | 1.25% | 5.49%  | VSGGGYDFGYDGFYRA           | 99.70% | 3.62 | 0.726 | 66.0  | 25.0 | 66.0  | 0 | 53 | 0 | 0 | 2       | 1675.65  | 9,516.96     | 74,700,000.00 |
| Collagen alpha-2(I) chain GN-COL2A2      | sp P08123 CO  | 100.00% | 20 | 20 | 326 | 1.25% | 5.49%  | VSGGGYDFGYDGFYRA           | 99.70% | 3.44 | 0.748 | 62.7  | 25.0 | 62.7  | 0 | 12 | 0 | 0 | 2       | 1618.63  | 7,580.47     | 11,900,000.00 |
| Collagen alpha-2(I) chain GN-COL2A2      | sp P08123 CO  | 100.00% | 20 | 20 | 326 | 1.25% | 5.49%  | VSGGGYDFGYDGFYRA           | 99.70% | 3.87 | 0.751 | 72.1  | 25.0 | 72.1  | 0 | 10 | 0 | 0 | 2       | 1512.59  | 7,290.29     | 7,703,980.00  |
| Collagen alpha-2(I) chain GN-COL2A2      | sp P08123 CO  | 100.00% | 20 | 20 | 326 | 1.25% | 5.49%  | VSGGGYDFGYDGFYRA           | 99.70% | 4.75 | 0.757 | 93.9  | 26.2 | 93.9  | 0 | 30 | 0 | 0 | 2       | 1831.76  | 6,809.31     | 44,300,000.00 |
| Collagen alpha-2(I) chain GN-COL2A2      | sp P08123 CO  | 100.00% | 20 | 20 | 326 | 1.25% | 5.49%  | VSGGGYDFGYDGFYRA           | 99.70% | 3.65 | 0.774 | 68.8  | 25.0 | 68.8  | 0 | 22 | 0 | 0 | 2       | 1588.63  | 6,588.50     | 36,300,000.00 |
| Collagen alpha-2(I) chain GN-COL2A2      | sp P08123 CO  | 100.00% | 16 | 16 | 62  | 0.41% | 6.08%  | GLRGEIGN                   | 99.70% | 1.65 | 0.198 | 43.5  | 31.6 | 27.7  | 0 | 1  | 0 | 0 | 2       | 815.44   | 1,935.28     | 19,960.40     |
| Collagen alpha-2(I) chain GN-COL2A2      | sp P08123 CO  | 100.00% | 16 | 16 | 62  | 0.41% | 6.08%  | GPVGRTEGEVAV               | 99.70% | 1.86 | 0.242 | 36.8  | 31.5 | 32.5  | 0 | 2  | 0 | 0 | 2       | 1098.59  | 2,653.30     | 367,114.00    |
| Collagen alpha-2(I) chain GN-COL2A2      | sp P08123 CO  | 100.00% | 16 | 16 | 62  | 0.41% | 6.08%  | GPAGARGSDGSGVP             | 99.70% | 2.39 | 0.310 | 57.5  | 32.9 | 17.2  | 0 | 1  | 0 | 0 | 2       | 1283.63  | 2,351.49     | 76,981.00     |
| Collagen alpha-2(I) chain GN-COL2A2      | sp P08123 CO  | 100.00% | 16 | 16 | 62  | 0.41% | 6.08%  | GPKEGAVGNA                 | 99.70% | 3.34 | 0.349 | 70.2  | 32.7 | 48.6  | 0 | 2  | 0 | 0 | 2       | 1294.68  | 2,790.99     | 25,371.00     |
| Collagen alpha-2(I) chain GN-COL2A2      | sp P08123 CO  | 100.00% | 16 | 16 | 62  | 0.41% | 6.08%  | FYGGDYFYRA                 | 99.70% | 3.14 | 0.376 | 49.9  | 29.8 | 49.9  | 0 | 4  | 0 | 0 | 2       | 1210.52  | 4,668.67     | 1,068,970.00  |
| Collagen alpha-2(I) chain GN-COL2A2      | sp P08123 CO  | 100.00% | 16 | 16 | 62  | 0.41% | 6.08%  | GPKEGAVGNA                 | 99.70% | 2.73 | 0.440 | 25.2  | 31.3 | 25.2  | 0 | 1  | 0 | 0 | 2       | 1069.56  | 2,333.63     | 78,831.40     |
| Collagen alpha-2(I) chain GN-COL2A2      | sp P08123 CO  | 100.00% | 16 | 16 | 62  | 0.41% | 6.08%  | GPAGARGSDGSGVP             | 99.70% | 2.84 | 0.469 | 35.3  | 33.8 | 23.2  | 0 | 1  | 0 | 0 | 2       | 1508.75  | 2,711.28     | 450,425.00    |
| Collagen alpha-2(I) chain GN-COL2A2      | sp P08123 CO  | 100.00% | 16 | 16 | 62  | 0.41% | 6.08%  | GGGVDFGYDGFYRA             | 99.70% | 2.62 | 0.534 | 53.6  | 25.9 | 53.6  | 0 | 2  | 0 | 0 | 2       | 1588.63  | 5,198.81     | 282,658.00    |
| Collagen alpha-2(I) chain GN-COL2A2      | sp P08123 CO  | 100.00% | 16 | 16 | 62  | 0.41% | 6.08%  | GGGVDFGYDGFYRA             | 99.70% | 3.18 | 0.537 | 59.6  | 31.4 | 45.8  | 0 | 2  | 0 | 0 | 2       | 1715.12  | 2,640,830.00 | 7,151.52      |
| Collagen alpha-2(I) chain GN-COL2A2      | sp P08123 CO  | 100.00% | 16 | 16 | 62  | 0.41% | 6.08%  | GGGVDFGYDGFYRA             | 99.70% | 3.22 | 0.603 | 50.3  | 25.0 | 50.3  | 0 | 6  | 0 | 0 | 2       | 1432.53  | 6,175.13     | 3,093,160.00  |
| Collagen alpha-2(I) chain GN-COL2A2      | sp P08123 CO  | 100.00% | 16 | 16 | 62  | 0.41% | 6.08%  | GGGVDFGYDGFYRA             | 99.70% | 3.91 | 0.654 | 64.9  | 27.1 | 64.9  | 0 | 4  | 0 | 0 | 2       | 1659.67  |              |               |

|                                      |               |         |    |    |      |       |        |                                 |        |      |       |       |      |       |   |   |   |   |   |         |            |               |
|--------------------------------------|---------------|---------|----|----|------|-------|--------|---------------------------------|--------|------|-------|-------|------|-------|---|---|---|---|---|---------|------------|---------------|
| Collagen alpha-3(VI) chain GN-COL6A3 | sp P12111 CO  | 100.00% | 36 | 36 | 45   | 0.17% | 0.00%  | LVNSLDIGNDIRVG                  | 99.70% | 3.05 | 0.511 | 45.0  | 33.2 | 45.0  | 0 | 1 | 0 | 0 | 2 | 1598.85 | 6,304.80   | 290,805.00    |
| Collagen alpha-3(VI) chain GN-COL6A3 | sp P12111 CO  | 100.00% | 36 | 36 | 45   | 0.17% | 0.00%  | IGNKAGDAQALEEAFDSS              | 99.70% | 3.28 | 0.515 | 24.1  | 32.8 | 24.1  | 0 | 1 | 0 | 0 | 2 | 1993.94 | 6,668.29   | 296,701.00    |
| Collagen alpha-3(VI) chain GN-COL6A3 | sp P12111 CO  | 100.00% | 36 | 36 | 45   | 0.17% | 0.00%  | VTGSAADPVR                      | 99.70% | 2.39 | 0.515 | 40.4  | 32.6 | 40.4  | 0 | 1 | 0 | 0 | 2 | 1241.65 | 365,959.00 | 0             |
| Collagen alpha-3(VI) chain GN-COL6A3 | sp P12111 CO  | 100.00% | 36 | 36 | 45   | 0.17% | 0.00%  | WQFSDDPKVFL                     | 99.70% | 3.56 | 0.524 | 29.3  | 33.7 | 9.3   | 0 | 2 | 0 | 0 | 2 | 1536.79 | 7,827.45   | 470,320.00    |
| Collagen alpha-3(VI) chain GN-COL6A3 | sp P12111 CO  | 100.00% | 36 | 36 | 45   | 0.17% | 0.00%  | QLGTQVQVSEVYTQ                  | 99.70% | 3.52 | 0.548 | 51.7  | 32.8 | 51.7  | 0 | 1 | 0 | 0 | 2 | 1685.92 | 6,133.36   | 386,091.00    |
| Collagen alpha-3(VI) chain GN-COL6A3 | sp P12111 CO  | 100.00% | 36 | 36 | 45   | 0.17% | 0.00%  | VGNVQLELSESOVLET                | 99.70% | 3.80 | 0.556 | 46.4  | 34.1 | 46.4  | 0 | 1 | 0 | 0 | 2 | 1873.94 | 5,889.05   | 185,219.00    |
| Collagen alpha-3(VI) chain GN-COL6A3 | sp P12111 CO  | 100.00% | 36 | 36 | 45   | 0.17% | 0.00%  | PANWNGDAQALEEAFDSS              | 99.70% | 4.31 | 0.575 | 38.7  | 33.2 | 28.4  | 0 | 4 | 0 | 0 | 2 | 2212.04 | 7,539.73   | 1,642,580.00  |
| Collagen alpha-3(VI) chain GN-COL6A3 | sp P12111 CO  | 100.00% | 36 | 36 | 45   | 0.17% | 0.00%  | QGNVNALEYSPR                    | 99.70% | 3.10 | 0.577 | 62.0  | 33.6 | 62.0  | 0 | 2 | 0 | 0 | 2 | 1462.76 | 6,860.00   | 1,918,970.00  |
| Collagen alpha-3(VI) chain GN-COL6A3 | sp P12111 CO  | 100.00% | 36 | 36 | 45   | 0.17% | 0.00%  | GGAVPIPGIGNADITEMQT             | 99.70% | 4.22 | 0.609 | 35.0  | 34.1 | 23.5  | 0 | 2 | 0 | 0 | 2 | 1929.96 | 6,910.36   | 694,692.00    |
| Collagen alpha-3(VI) chain GN-COL6A3 | sp P12111 CO  | 100.00% | 36 | 36 | 45   | 0.17% | 0.00%  | ISIFPDAVAIPTPR                  | 99.70% | 3.02 | 0.619 | 62.0  | 32.5 | 62.0  | 0 | 1 | 0 | 0 | 2 | 1693.93 | 10,055.70  | 43,744.20     |
| Collagen alpha-3(VI) chain GN-COL6A3 | sp P12111 CO  | 100.00% | 36 | 36 | 45   | 0.17% | 0.00%  | LDTSGVNQVDITGR                  | 99.70% | 4.17 | 0.642 | 65.4  | 31.5 | 65.4  | 0 | 1 | 0 | 0 | 2 | 1538.71 | 4,315.53   | 200,398.00    |
| Collagen alpha-3(VI) chain GN-COL6A3 | sp P12111 CO  | 100.00% | 36 | 36 | 45   | 0.17% | 0.00%  | VATDSGSGVNGVGRG                 | 99.70% | 4.08 | 0.655 | 59.6  | 32.0 | 59.6  | 0 | 1 | 0 | 0 | 2 | 1756.81 | 5,976.86   | 491,312.00    |
| Collagen alpha-3(VI) chain GN-COL6A3 | sp P12111 CO  | 100.00% | 36 | 36 | 45   | 0.17% | 0.00%  | LVLSGSGSDSDVDAVELKQFG           | 99.70% | 5.29 | 0.663 | 50.0  | 35.3 | 50.0  | 0 | 0 | 1 | 0 | 2 | 2561.30 | 7,318.20   | 472,544.00    |
| Decorin GN-DCN                       | sp P07585 PGI | 100.00% | 8  | 8  | 13   | 0.05% | 15.90% | LTLEHLDNKGRISR                  | 99.70% | 2.19 | 0.308 | 27.0  | 32.1 | 27.0  | 0 | 0 | 1 | 0 | 2 | 1495.82 | 4,235.05   | 128,876.00    |
| Decorin GN-DCN                       | sp P07585 PGI | 100.00% | 8  | 8  | 13   | 0.05% | 15.90% | LHLGDNKSRDAVAS                  | 99.70% | 2.19 | 0.362 | 23.4  | 32.9 | 23.4  | 0 | 0 | 1 | 0 | 2 | 1595.85 | 4,047.96   | 179,221.00    |
| Decorin GN-DCN                       | sp P07585 PGI | 100.00% | 8  | 8  | 13   | 0.05% | 15.90% | VLSNPVQVWVE                     | 99.70% | 3.49 | 0.407 | 38.1  | 33.3 | 38.5  | 0 | 2 | 0 | 0 | 2 | 1468.71 | 9,174.32   | 310,468.00    |
| Decorin GN-DCN                       | sp P07585 PGI | 100.00% | 8  | 8  | 13   | 0.05% | 15.90% | LFSNPVQVWVE                     | 99.70% | 2.54 | 0.505 | 55.7  | 32.4 | 58.5  | 0 | 3 | 0 | 0 | 2 | 1282.61 | 6,235.64   | 2,643,200.00  |
| Decorin GN-DCN                       | sp P07585 PGI | 100.00% | 8  | 8  | 13   | 0.05% | 15.90% | IGPEVDPRDPRFDS                  | 99.70% | 2.64 | 0.525 | 34.1  | 31.0 | 34.1  | 0 | 1 | 0 | 0 | 2 | 1572.72 | 5,443.09   | 615,425.00    |
| Decorin GN-DCN                       | sp P07585 PGI | 100.00% | 8  | 8  | 13   | 0.05% | 15.90% | VDAASLGNNLNAKLGLS               | 99.70% | 4.06 | 0.565 | 30.4  | 29.8 | 30.4  | 0 | 0 | 1 | 0 | 2 | 1784.03 | 7,355.10   | 324,979.00    |
| Decorin GN-DCN                       | sp P07585 PGI | 100.00% | 8  | 8  | 13   | 0.05% | 15.90% | VDAASLGNNLNAKLGLS               | 99.70% | 3.02 | 0.578 | 35.1  | 30.0 | 35.1  | 0 | 0 | 1 | 0 | 2 | 1583.91 | 6,543.91   | 337,344.00    |
| Decorin GN-DCN                       | sp P07585 PGI | 100.00% | 8  | 8  | 13   | 0.05% | 15.90% | LTLEHLDNKGRSRDAVAS              | 99.70% | 3.83 | 0.589 | 48.8  | 33.8 | 48.8  | 0 | 0 | 3 | 0 | 2 | 1939.02 | 4,886.37   | 2,789,480.00  |
| Dermatopontin GN-DPT                 | sp Q07507 DE  | 100.00% | 2  | 2  | 2    | 0.01% | 0.00%  | YFESVLDRWQ                      | 99.70% | 2.28 | 0.332 | 21.7  | 32.0 | 21.7  | 0 | 1 | 0 | 0 | 2 | 1471.69 | 1,814.84   | 250,674.00    |
| Dermatopontin GN-DPT                 | sp Q07507 DE  | 100.00% | 2  | 2  | 2    | 0.01% | 0.00%  | ISNYDYIVR                       | 99.70% | 2.49 | 0.518 | 51.4  | 32.0 | 51.4  | 0 | 0 | 0 | 0 | 2 | 1369.64 | 6,215.31   | 300,082.00    |
| EMILIN-1 GN-EMILIN1                  | sp Q096C2 EV  | 100.00% | 2  | 2  | 2    | 0.01% | 0.00%  | LAHSEPTFTSGAL                   | 99.70% | 2.34 | 0.297 | 45.3  | 33.3 | 30.7  | 0 | 1 | 0 | 0 | 2 | 1584.83 | 8,492.25   | 124,193.00    |
| EMILIN-1 GN-EMILIN1                  | sp Q096C2 EV  | 100.00% | 2  | 2  | 2    | 0.01% | 0.00%  | VGVSDSGGVPEGLEKNPKVAESQPGTVGVFS | 99.70% | 3.42 | 0.478 | 32.1  | 35.9 | 32.1  | 0 | 0 | 1 | 0 | 2 | 1373.65 | 6,543.29   | 83,269.70     |
| Fibrinogen alpha chain GN-FGA        | sp P02671 FIB | 100.00% | 8  | 10 | 20   | 0.08% | 0.00%  | FFSMALGEFVSETSRGSESG            | 99.70% | 1.82 | 0.202 | 38.1  | 30.1 | 24.3  | 0 | 0 | 0 | 0 | 2 | 1090.49 | 8,397.71   | 0             |
| Fibrinogen alpha chain GN-FGA        | sp P02671 FIB | 100.00% | 8  | 10 | 20   | 0.08% | 0.00%  | FFDTASTKTFPG                    | 99.70% | 2.52 | 0.480 | 53.1  | 32.1 | 53.1  | 0 | 4 | 0 | 0 | 2 | 1375.65 | 7,712.80   | 2,483,390.00  |
| Fibrinogen alpha chain GN-FGA        | sp P02671 FIB | 100.00% | 8  | 10 | 20   | 0.08% | 0.00%  | FRPDSSGNGARNPNPDWGTTEE          | 99.70% | 3.22 | 0.481 | 24.3  | 30.1 | 24.3  | 0 | 0 | 1 | 0 | 2 | 2547.13 | 5,594.35   | 45,857,400.00 |
| Fibrinogen alpha chain GN-FGA        | sp P02671 FIB | 100.00% | 8  | 10 | 20   | 0.08% | 0.00%  | FFDTASTKTFPG                    | 99.70% | 2.81 | 0.487 | 36.1  | 32.6 | 24.9  | 0 | 4 | 0 | 0 | 2 | 1522.72 | 7,557.40   | 95,911.00     |
| Fibrinogen alpha chain GN-FGA        | sp P02671 FIB | 100.00% | 8  | 10 | 20   | 0.08% | 0.00%  | FFSMALGEFVSETSRGSESG            | 99.70% | 4.02 | 0.543 | 67.3  | 33.2 | 67.3  | 0 | 0 | 0 | 0 | 2 | 1463.71 | 5,061.25   | 906,723.00    |
| Fibrinogen alpha chain GN-FGA        | sp P02671 FIB | 100.00% | 8  | 10 | 20   | 0.08% | 0.00%  | FFSMALGEFVSETSRGSESG            | 99.70% | 4.46 | 0.619 | 70.3  | 30.1 | 59.1  | 0 | 4 | 0 | 0 | 2 | 2280.01 | 8,297.09   | 689,216.00    |
| Fibrinogen alpha chain GN-FGA        | sp P02671 FIB | 100.00% | 8  | 10 | 20   | 0.08% | 0.00%  | FFSMALGEFVSETSR                 | 99.70% | 3.24 | 0.636 | 57.1  | 31.2 | 57.1  | 0 | 4 | 0 | 0 | 2 | 1878.86 | 8,377.40   | 97,814.00     |
| Fibrinogen alpha chain GN-FGA        | sp P02671 FIB | 100.00% | 8  | 10 | 20   | 0.08% | 0.00%  | NPSSAGSWSSGSGPGSTGNR            | 99.70% | 3.69 | 0.708 | 108.0 | 28.8 | 108.0 | 0 | 1 | 0 | 0 | 2 | 1963.85 | 3,109.44   | 26,520.00     |
| Fibrinogen alpha chain GN-FGA        | sp P02671 FIB | 100.00% | 4  | 4  | 4    | 0.03% | 0.00%  | LDVSNQDPTNR                     | 99.70% | 3.09 | 0.457 | 50.5  | 33.4 | 50.5  | 0 | 1 | 0 | 0 | 2 | 1463.71 | 4,050.07   | 180,342.00    |
| Fibrinogen alpha chain GN-FGA        | sp P02671 FIB | 100.00% | 4  | 4  | 4    | 0.03% | 0.00%  | FFSMALGEFVSETSR                 | 99.70% | 2.65 | 0.478 | 36.0  | 30.1 | 18.9  | 0 | 0 | 0 | 0 | 2 | 1522.72 | 6,607.18   | 210,032.00    |
| Fibrinogen alpha chain GN-FGA        | sp P02671 FIB | 100.00% | 4  | 4  | 4    | 0.03% | 0.00%  | FFDTASTKTFPG                    | 99.70% | 2.56 | 0.513 | 29.7  | 32.7 | 29.7  | 0 | 1 | 0 | 0 | 2 | 1375.65 | 4,805.45   | 902,865.00    |
| Fibrinogen alpha chain GN-FGA        | sp P02671 FIB | 100.00% | 4  | 4  | 4    | 0.03% | 0.00%  | NPSSAGSWSSGSGPGSTGNR            | 99.70% | 3.77 | 0.637 | 50.2  | 29.7 | 50.2  | 0 | 1 | 0 | 0 | 2 | 1963.85 | 2,100.41   | 13,919.40     |
| Fibrinogen beta chain GN-FGB         | sp P02675 FIB | 100.00% | 1  | 1  | 2    | 0.01% | 0.00%  | LRAPPPSGGGYR                    | 99.70% | 2.16 | 0.417 | 25.0  | 31.7 | 12.4  | 0 | 0 | 2 | 0 | 2 | 1437.80 | 4,028.32   | 373,568.00    |
| Fibrinogen beta chain GN-FGB         | sp P02675 FIB | 100.00% | 1  | 1  | 1    | 0.01% | 0.00%  | LRAPPPSGGGYR                    | 99.70% | 3.06 | 0.463 | 33.9  | 30.7 | 18.4  | 0 | 1 | 0 | 0 | 2 | 1437.80 | 379,078.00 | 0             |
| Fibrinogen gamma chain GN-FGG        | sp P02679-2 F | 100.00% | 6  | 7  | 15   | 0.06% | 0.00%  | PWLGNEKHL                       | 99.70% | 2.18 | 0.339 | 23.8  | 32.4 | 10.3  | 0 | 1 | 0 | 0 | 2 | 1256.68 | 7,270.59   | 546,013.00    |
| Fibrinogen gamma chain GN-FGG        | sp P02679-2 F | 100.00% | 6  | 7  | 15   | 0.06% | 0.00%  | PWLGNEKHL                       | 99.70% | 2.18 | 0.339 | 23.8  | 32.4 | 10.3  | 0 | 0 | 1 | 0 | 2 | 1256.68 | 7,270.59   | 546,013.00    |
| Fibrinogen gamma chain GN-FGG        | sp P02679-2 F | 100.00% | 6  | 7  | 15   | 0.06% | 0.00%  | PDGDFDGDPSDKF                   | 99.70% | 3.26 | 0.620 | 66.0  | 25.2 | 66.0  | 0 | 2 | 0 | 0 | 2 | 1608.65 | 7,631.11   | 396,776.00    |
| Fibrinogen gamma chain GN-FGG        | sp P02679-2 F | 100.00% | 6  | 7  | 15   | 0.06% | 0.00%  | PDGDFDGDPSDKF                   | 99.70% | 3.26 | 0.620 | 66.0  | 25.2 | 66.0  | 0 | 2 | 0 | 0 | 2 | 1608.65 | 7,631.11   | 396,776.00    |
| Fibrinogen gamma chain GN-FGG        | sp P02679-2 F | 100.00% | 6  | 7  | 15   | 0.06% | 0.00%  | FAGGAGDAGDFDGFDDGSDSKFF         | 99.70% | 3.97 | 0.630 | 37.7  | 25.0 | 37.7  | 0 | 1 | 0 | 0 | 2 | 1272.32 | 8,251.58   | 33,564.20     |
| Fibrinogen gamma chain GN-FGG        | sp P02679-2 F | 100.00% | 6  | 7  | 15   | 0.06% | 0.00%  | FAGGAGDAGDFDGFDDGSDSKFF         | 99.70% | 3.97 | 0.630 | 37.7  | 25.0 | 37.7  | 0 | 1 | 0 | 0 | 2 | 1272.32 | 8,251.58   | 33,564.20     |
| Fibrinogen gamma chain GN-FGG        | sp P02679-2 F | 100.00% | 6  | 7  | 15   | 0.06% | 0.00%  | FAGGAGDAGDFDGFDDGSDSKFF         | 99.70% | 4.82 | 0.684 | 77.7  | 25.0 | 77.7  | 0 | 1 | 0 | 0 | 2 | 2517.02 | 9,250.93   | 44,706.00     |
| Fibrinogen gamma chain GN-FGG        | sp P02679-2 F | 100.00% | 6  | 7  | 15   | 0.06% | 0.00%  | FAGGAGDAGDFDGFDDGSDSKFF         | 99.70% | 4.82 | 0.684 | 77.7  | 25.0 | 77.7  | 0 | 1 | 0 | 0 | 2 | 2517.02 | 9,250.93   | 44,706.00     |
| Fibrinogen gamma chain GN-FGG        | sp P02679-2 F | 100.00% | 6  | 7  | 15   | 0.06% | 0.00%  | FAGGAGDAGDFDGFDDGSDSKFF         | 99.70% | 4.52 | 0.737 | 66.4  | 25.0 | 66.4  | 0 | 1 | 0 | 0 | 2 | 2533.01 | 8,617.98   | 50,170.50     |
| Fibrinogen gamma chain GN-FGG        | sp P02679-2 F | 100.00% | 6  | 7  | 15   | 0.06% | 0.00%  | YFAGGAGDAGDFDGFDDGSDSKFF        | 99.70% | 4.52 | 0.737 | 66.4  | 25.0 | 66.4  | 0 | 1 | 0 | 0 | 2 | 2533.01 | 8,617.98   | 50,170.50     |
| Fibrinogen gamma chain GN-FGG        | sp P02679-2 F | 100.00% | 6  | 7  | 15   | 0.06% | 0.00%  | FAGGAGDAGDFDGFDDGSDSKFF         | 99.70% | 5.47 | 0.738 | 67.7  | 25.0 | 67.7  | 0 | 1 | 0 | 0 | 2 | 2369.95 | 8,213.68   | 2,501,710.00  |
| Fibrinogen gamma chain GN-FGG        | sp P02679-2 F | 100.00% | 6  | 7  | 15   | 0.06% | 0.00%  | FAGGAGDAGDFDGFDDGSDSKFF         | 99.70% | 5.47 | 0.738 | 67.7  | 25.0 | 67.7  | 0 | 8 | 1 | 0 | 2 | 2369.95 | 8,213.68   | 2,501,710.00  |
| Fibrinogen gamma chain GN-FGG        | sp P02679-2 F | 99.90%  | 1  | 1  | 4    | 0.03% | 0.00%  | FAGGAGDAGDFDGFDDGSDSKFF         | 99.70% | 5.90 | 0.743 | 74.3  | 25.7 | 74.3  | 0 | 4 | 0 | 0 | 2 | 2369.95 | 7,194.95   | 47,957.50     |
| Fibrinogen gamma chain GN-FGG        | sp P02679-2 F | 99.90%  | 1  | 1  | 4    | 0.03% | 0.00%  | FAGGAGDAGDFDGFDDGSDSKFF         | 99.70% | 5.90 | 0.743 | 74.3  | 25.7 | 74.3  | 0 | 4 | 0 | 0 | 2 | 2369.95 | 7,194.95   | 47,957.50     |
| Galectin-3 GN-LGALS3                 | sp P17931 LEC | 100.00% | 2  | 2  | 2    | 0.01% | 0.00%  | MLDFQRGNDA                      | 99.70% | 2.10 | 0.397 | 23.2  | 33.5 | 0.0   | 0 | 1 | 0 | 0 | 2 | 1318.68 | 5,618.34   | 116,679.00    |
| Galectin-3 GN-LGALS3                 | sp P17931 LEC | 100.00% | 2  | 2  | 2    | 0.01% | 0.00%  | LHDLASGNNPNPGWPG                | 99.70% | 3.63 | 0.536 | 32.4  | 31.5 | 32.4  | 0 | 1 | 0 | 0 | 2 | 1803.84 | 5,406.20   | 823,199.00    |
| Gelsolin GN-GSN                      | sp P06396 GEI | 100.00% | 16 | 16 | 19</ |       |        |                                 |        |      |       |       |      |       |   |   |   |   |   |         |            |               |

|                                                                |               |         |    |    |    |       |        |                         |        |      |       |      |      |      |   |   |   |   |   |         |            |              |
|----------------------------------------------------------------|---------------|---------|----|----|----|-------|--------|-------------------------|--------|------|-------|------|------|------|---|---|---|---|---|---------|------------|--------------|
| Microfibril-associated glycoprotein 4 GN-MFAP4                 | sp P55083-2 A | 100.00% | 2  | 2  | 3  | 0.01% | 0.00%  | LVAFGEDEGGAGDLSVHSGKQ   | 99.70% | 2.93 | 0.374 | 33.8 | 32.7 | 33.8 | 0 | 0 | 1 | 0 | 2 | 2242.04 | 6,198.12   | 375,568.00   |
| Microfibril-associated glycoprotein 4 GN-MFAP4                 | sp P55083-2 A | 100.00% | 2  | 2  | 3  | 0.01% | 0.00%  | LVAFGEDEGGAGDLSVHSGKQ   | 99.70% | 2.93 | 0.374 | 33.8 | 32.7 | 33.8 | 0 | 0 | 1 | 0 | 2 | 2242.04 | 6,198.12   | 375,568.00   |
| Microfibril-associated glycoprotein 4 GN-MFAP4                 | sp P55083-2 A | 100.00% | 2  | 2  | 3  | 0.01% | 0.00%  | LVAFGEDEGGAGDLSVHSGKQ   | 99.70% | 2.93 | 0.374 | 33.8 | 32.7 | 33.8 | 0 | 0 | 1 | 0 | 2 | 2242.04 | 6,198.12   | 375,568.00   |
| Microfibril-associated glycoprotein 4 GN-MFAP4                 | sp P55083-2 A | 100.00% | 2  | 2  | 3  | 0.01% | 0.00%  | LVAFGEDEGGAGDLSVHSGKQ   | 99.70% | 2.93 | 0.374 | 33.8 | 32.7 | 33.8 | 0 | 0 | 1 | 0 | 2 | 2242.04 | 6,198.12   | 375,568.00   |
| Peroxiredoxin-5, mitochondrial GN-PRDX5                        | sp P30044 PRI | 100.00% | 4  | 4  | 7  | 0.03% | 15.00% | LAADPTGAFGKGTDLLLDGLVS  | 99.70% | 3.73 | 0.411 | 15.6 | 31.1 | 25.7 | 0 | 1 | 0 | 0 | 2 | 2290.23 | 9,282.96   | 1,019,800.00 |
| Peroxiredoxin-5, mitochondrial GN-PRDX5                        | sp P30044 PRI | 100.00% | 4  | 4  | 7  | 0.03% | 15.00% | LAADPTGAFGKGTDLLLDGLVS  | 99.70% | 4.15 | 0.557 | 30.7 | 34.0 | 30.7 | 0 | 2 | 0 | 0 | 2 | 1977.97 | 7,824.70   | 468,169.00   |
| Peroxiredoxin-5, mitochondrial GN-PRDX5                        | sp P30044 PRI | 100.00% | 4  | 4  | 7  | 0.03% | 15.00% | LAADPTGAFGKGTDLLLDGLVS  | 99.70% | 3.70 | 0.564 | 45.9 | 34.4 | 45.9 | 0 | 1 | 0 | 0 | 2 | 2091.05 | 8,467.37   | 91,505.00    |
| Phosphatidylethanolamine-binding protein 1 GN-PEBP1            | sp P30086 PEE | 100.00% | 5  | 5  | 7  | 0.03% | 0.00%  | AAVDELGVLTPTQVKNRPTS    | 99.70% | 2.99 | 0.322 | 29.0 | 32.3 | 29.0 | 0 | 0 | 1 | 0 | 2 | 2224.23 | 5,388.49   | 444,578.00   |
| Phosphatidylethanolamine-binding protein 1 GN-PEBP1            | sp P30086 PEE | 100.00% | 5  | 5  | 7  | 0.03% | 0.00%  | LVLTDPDAPSR             | 99.70% | 2.45 | 0.450 | 36.9 | 32.2 | 25.4 | 0 | 1 | 0 | 0 | 2 | 1183.63 | 4,453.22   | 154,488.00   |
| Phosphatidylethanolamine-binding protein 1 GN-PEBP1            | sp P30086 PEE | 100.00% | 5  | 5  | 7  | 0.03% | 0.00%  | LVLTDPDAPSR             | 99.70% | 2.62 | 0.460 | 37.5 | 32.3 | 25.5 | 0 | 1 | 0 | 0 | 2 | 1185.68 | 4,134.47   | 162,266.00   |
| Phosphatidylethanolamine-binding protein 1 GN-PEBP1            | sp P30086 PEE | 100.00% | 5  | 5  | 7  | 0.03% | 0.00%  | LQEVDEQDPHPVHTVAG       | 99.70% | 2.50 | 0.537 | 25.6 | 33.9 | 14.4 | 0 | 0 | 1 | 0 | 2 | 2061.00 | 4,617.40   | 1,080,630.00 |
| Phosphatidylethanolamine-binding protein 1 GN-PEBP1            | sp P30086 PEE | 100.00% | 5  | 5  | 7  | 0.03% | 0.00%  | ISWDGLSGKLYT            | 99.70% | 1.68 | 0.629 | 53.2 | 33.1 | 53.2 | 0 | 2 | 0 | 0 | 2 | 1454.72 | 6,985.83   | 1,445,120.00 |
| Phosphatidylethanolamine-binding protein 1 GN-PEBP1            | sp P30086 PEE | 100.00% | 4  | 4  | 7  | 0.05% | 0.00%  | LVLTDPDAPSR             | 99.70% | 2.38 | 0.360 | 43.4 | 31.8 | 24.8 | 0 | 1 | 0 | 0 | 2 | 1183.63 | 3,706.85   | 703,483.00   |
| Phosphatidylethanolamine-binding protein 1 GN-PEBP1            | sp P30086 PEE | 100.00% | 4  | 4  | 7  | 0.05% | 0.00%  | LVLTDPDAPSR             | 99.70% | 3.73 | 0.411 | 15.6 | 31.1 | 25.7 | 0 | 0 | 1 | 0 | 2 | 2224.23 | 5,388.49   | 444,578.00   |
| Phosphatidylethanolamine-binding protein 1 GN-PEBP1            | sp P30086 PEE | 100.00% | 4  | 4  | 7  | 0.05% | 0.00%  | ISWDGLSGKLYT            | 99.70% | 3.21 | 0.464 | 46.3 | 33.3 | 46.3 | 0 | 3 | 0 | 0 | 2 | 1454.72 | 6,040.50   | 1,492,800.00 |
| Phosphatidylethanolamine-binding protein 1 GN-PEBP1            | sp P30086 PEE | 100.00% | 4  | 4  | 7  | 0.05% | 0.00%  | PVDLSKWSGLPS            | 99.70% | 2.81 | 0.587 | 41.1 | 32.3 | 26.2 | 0 | 2 | 0 | 0 | 2 | 1285.68 | 5,732.65   | 913,639.00   |
| Plasminogen activator inhibitor 1 RNA-binding protein GN-SERP1 | sp Q8NC51 PA  | 99.90%  | 1  | 1  | 1  | 0.01% | 0.00%  | RPDQQLQEGKIIR           | 99.70% | 3.18 | 0.362 | 28.5 | 32.5 | 28.5 | 0 | 0 | 1 | 0 | 2 | 1752.94 | 2,638.89   | 82,709.00    |
| Prelamin-A/C GN-LMNA                                           | sp P02545 LM  | 100.00% | 2  | 2  | 4  | 0.02% | 0.00%  | SVGGSGGSGFDNLVTRY       | 99.70% | 3.98 | 0.596 | 52.0 | 32.4 | 52.0 | 0 | 1 | 0 | 0 | 2 | 1816.85 | 5,868.20   | 353,998.00   |
| Prelamin-A/C GN-LMNA                                           | sp P02545 LM  | 100.00% | 2  | 2  | 4  | 0.02% | 0.00%  | SVGGSGGSGFDNLVTRY       | 99.70% | 4.12 | 0.638 | 95.1 | 33.0 | 95.1 | 0 | 3 | 0 | 0 | 2 | 1566.75 | 4,947.09   | 795,888.00   |
| Protein GN-PREP                                                | sp P51888 PRI | 100.00% | 6  | 7  | 8  | 0.03% | 12.80% | LRWINLDNRR              | 99.70% | 3.96 | 0.336 | 36.6 | 32.5 | 21.6 | 0 | 0 | 1 | 0 | 2 | 1313.71 | 5,646.57   | 469,848.00   |
| Protein GN-PREP                                                | sp P51888 PRI | 100.00% | 6  | 7  | 8  | 0.03% | 12.80% | KIDQRIKLEKPG            | 99.70% | 2.92 | 0.381 | 29.0 | 27.4 | 29.0 | 0 | 0 | 1 | 0 | 2 | 1395.83 | 4,605.43   | 196,337.00   |
| Protein GN-PREP                                                | sp P51888 PRI | 100.00% | 6  | 7  | 8  | 0.03% | 12.80% | HFDFSSLENVPH            | 99.70% | 3.71 | 0.479 | 25.6 | 30.2 | 25.6 | 0 | 1 | 1 | 0 | 2 | 1543.68 | 5,757.96   | 926,757.00   |
| Protein GN-PREP                                                | sp P51888 PRI | 100.00% | 6  | 7  | 8  | 0.03% | 12.80% | PPQVSKLEKLL             | 99.70% | 2.53 | 0.496 | 33.6 | 28.1 | 33.6 | 0 | 0 | 1 | 0 | 2 | 1539.91 | 10,187.50  | 13,159.50    |
| Protein GN-PREP                                                | sp P51888 PRI | 100.00% | 6  | 7  | 8  | 0.03% | 12.80% | TSQLENVPH               | 99.70% | 2.63 | 0.808 | 30.9 | 46.8 | 30.9 | 0 | 0 | 1 | 0 | 2 | 1144.53 | 4,822.40   | 222,098.00   |
| Protein GN-PREP                                                | sp P51888 PRI | 100.00% | 6  | 7  | 8  | 0.03% | 12.80% | PPQVSKLEKLL             | 99.70% | 3.22 | 0.549 | 27.3 | 29.5 | 27.3 | 0 | 2 | 0 | 0 | 2 | 1426.83 | 9,423.88   | 347,422.00   |
| Protein GN-PREP                                                | sp P51888 PRI | 100.00% | 2  | 2  | 2  | 0.01% | 6.02%  | LRWINLDNRR              | 99.70% | 3.16 | 0.244 | 27.5 | 32.0 | 15.7 | 0 | 0 | 1 | 0 | 2 | 1313.71 | 232,564.00 |              |
| Protein GN-PREP                                                | sp P51888 PRI | 100.00% | 2  | 2  | 2  | 0.01% | 6.02%  | PPQVSKLEKLL             | 99.70% | 2.91 | 0.463 | 32.1 | 28.5 | 32.1 | 0 | 1 | 0 | 0 | 2 | 1426.83 | 8,598.11   | 45,887.70    |
| Protein disulfide-isomerase GN-P4HB                            | sp P07237 PDI | 100.00% | 3  | 3  | 6  | 0.02% | 0.00%  | LVESSEVAIVGFKFDVSDSAKQF | 99.70% | 2.88 | 0.299 | 53.9 | 35.2 | 40.5 | 0 | 0 | 1 | 0 | 2 | 2631.32 | 9,740.84   | 207,656.00   |
| Protein disulfide-isomerase GN-P4HB                            | sp P07237 PDI | 100.00% | 3  | 3  | 6  | 0.02% | 0.00%  | LQAAEADDIPFG            | 99.70% | 3.28 | 0.407 | 55.8 | 33.3 | 39.3 | 0 | 4 | 0 | 0 | 2 | 1359.68 | 8,010.65   | 1,752,420.00 |
| Protein disulfide-isomerase GN-P4HB                            | sp P07237 PDI | 100.00% | 3  | 3  | 6  | 0.02% | 0.00%  | VIGFIVKSDSAKQF          | 99.70% | 3.86 | 0.546 | 26.8 | 34.0 | 26.8 | 0 | 0 | 1 | 0 | 2 | 1816.91 | 7,144.06   | 428,076.00   |
| Protein disulfide-isomerase GN-P4HB                            | sp P07237 PDI | 100.00% | 4  | 4  | 4  | 0.03% | 0.00%  | LVESSEVAIVGFKFDVSDSAKQF | 99.70% | 3.17 | 0.371 | 20.0 | 35.2 | 20.0 | 0 | 0 | 1 | 0 | 2 | 2631.32 | 8,597.98   | 187,069.00   |
| Protein disulfide-isomerase GN-P4HB                            | sp P07237 PDI | 100.00% | 4  | 4  | 4  | 0.03% | 0.00%  | VIGFIVKSDSAKQF          | 99.70% | 2.68 | 0.430 | 18.6 | 34.1 | 18.6 | 0 | 0 | 1 | 0 | 2 | 1816.91 | 6,007.97   | 345,148.00   |
| Protein disulfide-isomerase GN-P4HB                            | sp P07237 PDI | 100.00% | 4  | 4  | 4  | 0.03% | 0.00%  | LKAVQATESSGLAQZGQ       | 99.70% | 2.87 | 0.478 | 27.5 | 34.1 | 27.5 | 0 | 0 | 1 | 0 | 2 | 1837.88 | 5,112.85   | 21,672.00    |
| Protein disulfide-isomerase GN-P4HB                            | sp P07237 PDI | 100.00% | 4  | 4  | 4  | 0.03% | 0.00%  | LQAAEADDIPFG            | 99.70% | 3.17 | 0.540 | 55.0 | 33.7 | 37.3 | 0 | 1 | 0 | 0 | 2 | 1359.68 | 7,231.47   | 1,446,240.00 |
| Scavenger receptor class A member 5 GN-SCARA5 PE-2 SV-1        | sp Q6ZM2 SC   | 100.00% | 1  | 1  | 1  | 0.00% | 0.00%  | GEKGRAGDASGVE           | 99.70% | 2.54 | 0.277 | 49.5 | 31.0 | 38.1 | 0 | 0 | 0 | 1 | 2 | 1347.61 | 5,354.82   | 670,370.00   |
| Talin-1 GN-TLN1                                                | sp Q9Y490 TL  | 100.00% | 2  | 2  | 2  | 0.01% | 0.00%  | HSQVDATAGTASVNV         | 99.70% | 3.24 | 0.583 | 19.7 | 33.6 | 19.7 | 0 | 1 | 0 | 0 | 2 | 1682.87 | 5,117.05   | 140,939.00   |
| Talin-1 GN-TLN1                                                | sp Q9Y490 TL  | 100.00% | 2  | 2  | 2  | 0.01% | 0.00%  | VELTASVDLKAS            | 99.70% | 3.06 | 0.584 | 35.7 | 33.7 | 25.5 | 0 | 0 | 0 | 1 | 2 | 1533.80 | 6,089.93   | 896,955.00   |
| Talin-1 GN-TLN1                                                | sp Q9Y490 TL  | 100.00% | 1  | 1  | 1  | 0.01% | 0.00%  | VLDTASVDLKAS            | 99.70% | 3.02 | 0.459 | 34.7 | 33.6 | 34.7 | 0 | 1 | 0 | 0 | 2 | 1533.80 | 5,339.03   | 543,336.00   |
| Tenascin-R GN-TNR                                              | sp Q92752 TE  | 100.00% | 1  | 1  | 1  | 0.00% | 0.00%  | VSNILSP                 | 99.70% | 2.37 | 0.242 | 40.2 | 27.8 | 23.2 | 0 | 1 | 0 | 0 | 2 | 955.58  | 5,636.36   | 457,403.00   |
| Tenascin-X GN-TNBX                                             | sp P22105 TE  | 100.00% | 2  | 2  | 2  | 0.01% | 0.00%  | LLVDGQSKLSGLEPTPYRF     | 99.70% | 2.78 | 0.295 | 27.3 | 33.5 | 27.3 | 0 | 0 | 1 | 0 | 2 | 2548.37 | 7,706.61   | 171,218.00   |
| Tenascin-X GN-TNBX                                             | sp P22105 TE  | 100.00% | 2  | 2  | 2  | 0.01% | 0.00%  | LLTETFPVPPAGGLLS        | 99.70% | 2.64 | 0.451 | 21.6 | 31.5 | 21.6 | 0 | 0 | 1 | 0 | 2 | 1913.05 | 7,914.32   | 93,748.40    |
| Tenxin-1 GN-TSX1                                               | sp Q9H4BL TE  | 100.00% | 1  | 1  | 1  | 0.00% | 0.00%  | FUTPSTPQQPQAPSLG        | 99.70% | 2.97 | 0.473 | 24.4 | 34.2 | 24.4 | 0 | 0 | 1 | 0 | 2 | 2026.04 | 5,088.49   | 55,147.00    |
| Transforming growth factor-beta-induced protein ig-h3 GN-TGFB1 | sp Q15582 BG  | 100.00% | 3  | 3  | 3  | 0.01% | 6.00%  | LAASDVSTADIFRQAGLGNH    | 99.70% | 2.47 | 0.322 | 20.9 | 34.7 | 20.9 | 0 | 0 | 1 | 0 | 2 | 2285.15 | 8,906.48   | 130,594.00   |
| Transforming growth factor-beta-induced protein ig-h3 GN-TGFB1 | sp Q15582 BG  | 100.00% | 3  | 3  | 3  | 0.01% | 6.00%  | IFAPSNIAWASPAEVLDS      | 99.70% | 3.18 | 0.479 | 19.0 | 34.2 | 19.0 | 0 | 0 | 1 | 0 | 2 | 2016.99 | 9,645.67   | 145,741.00   |
| Transforming growth factor-beta-induced protein ig-h3 GN-TGFB1 | sp Q15582 BG  | 100.00% | 3  | 3  | 3  | 0.01% | 6.00%  | LAASDVSTADIFR           | 99.70% | 4.53 | 0.656 | 69.5 | 33.7 | 69.5 | 0 | 1 | 0 | 0 | 2 | 1607.83 | 8,136.45   | 342,109.00   |
| Transforming growth factor-beta-induced protein ig-h3 GN-TGFB1 | sp Q15582 BG  | 100.00% | 1  | 1  | 1  | 0.01% | 2.64%  | LAASDVSTADIFRQAG        | 99.70% | 3.04 | 0.508 | 46.2 | 34.1 | 46.2 | 0 | 0 | 1 | 0 | 2 | 1863.94 | 7,432.78   | 99,947.50    |
| Tryptase alpha/beta-1 GN-TPSA1                                 | sp Q15661 TR  | 99.60%  | 1  | 1  | 1  | 0.00% | 0.00%  | IVHPIQF                 | 99.70% | 2.10 | 0.377 | 19.0 | 32.3 | 19.0 | 0 | 1 | 0 | 0 | 2 | 1016.56 | 5,877.38   | 66,335.00    |
| Verican core protein GN-VCAN                                   | sp P13611 CSF | 100.00% | 1  | 1  | 1  | 0.00% | 0.32%  | LTVDGVVHYR              | 99.70% | 2.27 | 0.366 | 26.5 | 33.2 | 11.8 | 0 | 0 | 1 | 0 | 2 | 1305.70 | 6,223.95   | 262,180.00   |
| Vimentin GN-VIM                                                | sp P08670 VIM | 100.00% | 34 | 36 | 49 | 0.19% | 60.70% | LQEEIAFLK               | 99.70% | 3.03 | 0.190 | 35.5 | 29.4 | 7.5  | 0 | 0 | 1 | 0 | 2 | 1218.71 | 5,364.92   | 330,540.00   |
| Vimentin GN-VIM                                                | sp P08670 VIM | 100.00% | 34 | 36 | 49 | 0.19% | 60.70% | FADLSEANN               | 99.70% | 2.38 | 0.227 | 41.1 | 32.5 | 22.6 | 0 | 1 | 0 | 0 | 2 | 1093.59 | 86,497.70  | 1,093,500.00 |
| Vimentin GN-VIM                                                | sp P08670 VIM | 100.00% | 34 | 36 | 49 | 0.19% | 60.70% | LADANTFKNTFR            | 99.70% | 2.58 | 0.254 | 33.3 | 35.5 | 7.3  | 0 | 0 | 1 | 0 | 2 | 1492.78 | 4,422.55   | 609,415.00   |
| Vimentin GN-VIM                                                | sp P08670 VIM | 100.00% | 34 | 36 | 49 | 0.19% | 60.70% | FLEQQNKLLAEQK           | 99.70% | 2.76 | 0.255 | 43.5 | 32.9 | 21.1 | 0 | 1 | 0 | 0 | 2 | 1815.99 | 7,649.90   | 543,487.00   |
| Vimentin GN-VIM                                                | sp P08670 VIM | 100.00% | 34 | 36 | 49 | 0.19% | 60.70% | HLEYQDLNVKMA            | 99.70% | 2.85 | 0.255 | 29.4 | 33.9 | 21.0 | 0 | 0 | 1 | 0 | 2 | 1729.91 | 6,048.52   | 113,013.00   |
| Vimentin GN-VIM                                                | sp P08670 VIM | 100.00% | 34 | 36 | 49 | 0.19% | 60.70% | VAANKLQEAEEWYKSFAD      | 99.70% | 3.27 | 0.324 | 26.4 | 34.6 | 15.2 | 0 | 0 | 1 | 0 | 2 | 2227.10 | 6,761.34   | 762,996.00   |
| Vimentin GN-VIM                                                | sp P08670 VIM | 100.00% | 34 | 36 | 49 | 0.19% | 60.70% | LDEIATYR                | 99.70% | 2.86 | 0.350 | 56.3 | 32.2 | 38.2 | 0 | 0 | 1 | 0 | 2 | 1093.59 | 682,783.00 | 6,075.93     |
| Vimentin GN-VIM                                                | sp P08670 VIM | 100.00% | 34 | 36 | 49 | 0.19% | 60.70% | SVYSSPGGVYATRSS         |        |      |       |      |      |      |   |   |   |   |   |         |            |              |
